# Supplementary material for: Solvatochromic studies of pull–push molecules containing dimethylaniline and aromatic hydrocarbon linked by an acetylene unit
Source: Royal Society of Chemistry journal article supplement (doi:10.1039/c4ra06999d), 2014-01-01
Supplement: c4ra06999d1.pdf [file c4ra06999d1.pdf]

## Electronic Supporting Informations

Solvatochromic studies of pull-push molecules containing dimethylaniline  
and aromatic hydrocarbon linked by acetylene unit

Irena Bylińska, Małgorzata Wierzbicka, Cezary Czaplewski, Wiesław Wiczek\*

Faculty of Chemistry, University of Gdańsk

80-308 Gdańsk, Wita Stwosza 63, Poland

Table 1 ESI Solvent properties (n-refractive index,  $\epsilon$ - electric permittivity and Kamlet-Taft ( $\alpha, \beta, \pi^*$ ) and Catalan (SP, SdP, SB, SA) empirical solvent parameters.

|    | Solvent                          | $n^{1,2}$ | $\epsilon^{2,3}$ | $E_T^{N1,2,4}$ | $\alpha^{2,3,5}$ | $\beta$ | $\pi^*$ | SP <sup>6</sup> | SdP   | SB    | SA    |
|----|----------------------------------|-----------|------------------|----------------|------------------|---------|---------|-----------------|-------|-------|-------|
| 1  | MeOH                             | 1.3306    | 32.63            | 0.762          | 0.98             | 0.66    | 0.6     | 0.86            | 0.9   | 0.55  | 0.61  |
| 2  | EtOH                             | 1.3594    | 24.55            | 0.654          | 0.86             | 0.75    | 0.54    | 0.85            | 0.78  | 0.66  | 0.4   |
| 3  | iso-propyl alcohol (iPrOH)       | 1.38126   | 18.3             | 0.546          | 0.76             | 0.84    | 0.48    | 0.85            | 0.81  | 0.83  | 0.28  |
| 4  | 2,2,2-trifluoroethanol (TFE)     | 1.291     | 26.67            | 0.898          | 1.51             | 0       | 0.73    | 0.91            | 0.92  | 0.11  | 0.89  |
| 5  | hexafluoro-2-propanol (HFIP)     | 1.277     | 16.62            | 1.07           | 1.96             | 0       | 0.65    | 1.014           | --    | 0.014 | 1.01  |
| 6  | n-hexane                         | 1.3726    | 1.89             | 0.01           | 0                | 0       | -0.011  | 0.519           | 0     | 0.056 | 0     |
| 7  | iso-octane                       | 1.3914    | 1.843            | 0.01           | 0                | 0       | 0.01    | 0.54            | 0     | 0.08  | 0     |
| 8  | n-hexadecane                     | 1.4345    | 2.05             | 0.009          | 0                | 0       | 0.03    | 0.578           | 0     | 0.086 | 0     |
| 9  | squalane (SQ)                    | 1.453     | 2.23             | --             | --               | --      | --      | --              | 0     | 0.05  | 0     |
| 10 | cyclohexane                      | 1.4263    | 2.023            | 0.006          | 0                | 0       | 0       | 0.56            | 0     | 0.07  | 0     |
| 11 | toluene                          | 1.49718   | 2.38             | 0.099          | 0                | 0.11    | 0.54    | 0.68            | 0.28  | 0.13  | 0     |
| 12 | 1-chloro-n-propane               | 1.388     | 8.59             | 0.207          | --               | --      | --      | --              | --    | --    | --    |
| 13 | 1-chloro-n-butane                | 1.4       | 7.39             | 0.19           | 0                | 0       | 0.39    | 0.84            | 0.529 | 0.138 | 0     |
| 14 | 1-chloro-n-hexane                | 1.419     | 6.1              | --             | --               | --      | --      | --              | --    | --    | --    |
| 15 | 1-chloro-n-octane                | 1.43      | 5.1              | --             | --               | --      | --      | --              | --    | --    | --    |
| 16 | 1-chloro-n-decane                | 1.438     | 4.58             | --             | --               | --      | --      | --              | --    | --    | --    |
| 17 | 1-chloro-n-hexadecane            | 1.45      | 3.7              | --             | --               | --      | --      | --              | --    | --    | --    |
| 18 | acetone                          | 1.3588    | 20.7             | 0.355          | 0.08             | 0.48    | 0.62    | 0.881           | 0.91  | 0.475 | 0     |
| 19 | acetonitrile                     | 1.34596   | 37.5             | 0.46           | 0.19             | 0.4     | 0.66    | 0.895           | 0.97  | 0.286 | 0.044 |
| 20 | 1,4-dioxane                      | 1.422     | 2.235            | 0.164          | 0                | 0.37    | 0.55    | 0.7             | 0.31  | 0.44  | 0     |
| 21 | tetrahydrofuran (THF)            | 1.407     | 7.6              | 0.207          | 0                | 0.55    | 0.58    | 0.84            | 0.63  | 0.59  | 0     |
| 22 | 2-methyl-tetrahydrofuran (MeTHF) | 1.4051    | 5.26             | 0.179          | 0                | 0.45    | 0.48    | 0.717           | 0.77  | 0.584 | 0     |
| 23 | Diethyl eter (Et <sub>2</sub> O) | 1.3526    | 4.2              | 0.117          | 0                | 0.47    | 0.24    | 0.694           | 0.39  | 0.562 | 0     |
| 24 | Ethyl acetate (AcOEt)            | 1.3726    | 6.11             | 0.228          | 0                | 0.45    | 0.55    | 0.8             | 0.6   | 0.54  | 0     |
| 25 | N,N-dimethylformamide (DMF)      | 1.431     | 37               | 0.386          | 0                | 0.69    | 0.88    | 0.954           | 0.98  | 0.613 | 0.031 |
| 26 | Dimethyl sulfoxide (DMSO)        | 1.479     | 46.7             | 0.444          | 0                | 0.76    | 1       | 1               | 1     | 0.647 | 0.072 |

<sup>1</sup> P.J. Cerón-Carrasco, D. Jacquemin, C. Laurence, A. Planchat, C. Reichardt, K. Sraïdi, J. Phys. Org. Chem., 2014, **27**, 512

<sup>2</sup> E. Krystkowiak, A. Maciejewski, Phys. Chem. Chem. Phys., 2011, **13**, 11317

<sup>3</sup> Z. Pawlowska, A. Lietard, S. Aloïse, M. Sliwa, A. Idrissi, O. Poizat, G. Buntinx, S. Delbaere, A. Perrier, F. Maurel, P. Jacques, J. Abe, Phys. Chem. Chem. Phys., 2011, **13**, 13185

<sup>4</sup> C. Reichardt, Chem. Rev., 1994, **94**, 2319

<sup>5</sup> A. de Juan, G. Fonrodona, E. Casassas, Trends in analytical chemistry, 1997, **16**, 52

<sup>6</sup> J. Catalàn, J. Phys. Chem. B., 2009, **113**, 5951

Table 2 ESI. Half-width of emission spectra of 1NacDMA and 2NacDMA in protic solvents.

| hw [cm <sup>-1</sup> ] |         |         |
|------------------------|---------|---------|
| solvent                | 1NacDMA | 2NacDMA |
| HFiP                   | 4800    | 5700    |
| TFE                    | 5300    | 6400    |
| MeOH                   | 4900    | 4950    |
| EtOH                   | 4450    | 4700    |
| iPrOH                  | 4450    | 4700    |

Table 3 ESI Intercept, slope and coefficient of the quality of fit ( $r^2$ ) estimated from the dependence of a given photophysical parameter on solvent polarity index  $E_T^N$  for compounds studied. N.p. denote number of solvents used for a linear correlation.

| quantity                                                     | intercept              | slope                    | $r^2$            | N.p.             |
|--------------------------------------------------------------|------------------------|--------------------------|------------------|------------------|
| 1NacDMA                                                      |                        |                          |                  |                  |
| $v_{abs}^{max}$ [ $cm^{-1}$ ]                                | 28838±96               | -2584±398                | 0.7509           | 16               |
| $v_{fluo}^{max}$ [ $cm^{-1}$ ]                               | 26370±229<br>24716±418 | -15208±934<br>-4921±63   | 0.9489<br>0.9837 | 16<br>3(protic)  |
| $\Delta v = v_{abs}^{max} - v_{fluo}^{max}$<br>[ $cm^{-1}$ ] | 2468±187<br>4002±384   | 12624±771<br>4699±528    | 0.9748<br>0.9755 | 16<br>4 (protic) |
| $\phi$                                                       | 0.91±0.05              | -1.05±0.2                | 0.6581           | 16               |
| $\tau$ [ns]                                                  | 0.93±1.62              | -5.02±0.6                | 0.8002           | 16               |
| $k_f * 10^{-8}$ [ $s^{-1}$ ]                                 | 7.28±0.37              | -14.4±1.5                | 0.8617           | 16               |
| $k_{nr} * 10^{-8}$ [ $s^{-1}$ ]                              | 1.03±0.38              | 2.55±1.59                | 0.1560           | 16               |
| $\mu * 10^5$ [ $cm^3/s$ ]                                    | 2.05±0.06              | -2.62±0.23               | 0.9062           | 15               |
| 2NacDMA                                                      |                        |                          |                  |                  |
| $v_{abs}^{max}$ [ $cm^{-1}$ ]                                | 27206±66               | 435±192                  | 0.2309           | 19               |
| $v_{fluo}^{max}$ [ $cm^{-1}$ ]                               | 27050±237<br>25710±665 | -16124±979<br>-5227±1008 | 0.9509<br>0.9642 | 16<br>3 (protic) |
| $\Delta v = v_{abs}^{max} - v_{fluo}^{max}$<br>[ $cm^{-1}$ ] | 1161±276<br>1158±1045  | 16512±1137<br>7862±1438  | 0.9378<br>0.9442 | 16<br>4 (protic) |
| $\phi$                                                       | 0.870±0.048            | -0.708±0.199             | 0.4749           | 16               |
| $\tau$ [ns]                                                  | 0.74±0.17              | 5.08±0.71                | 0.7861           | 16               |
| $k_f * 10^{-8}$ [ $s^{-1}$ ]                                 | 8.11±0.37              | -14.9±1.5                | 0.8724           | 16               |
| $k_{nr} * 10^{-8}$ [ $s^{-1}$ ]                              | 1.48±0.37              | 0.73±1.52                | 0.0163           | 16               |
| $\mu * 10^5$ [ $cm^3/s$ ]                                    | 2.69±0.16              | -3.79±0.56               | 0.8224           | 12               |
| AacDMA                                                       |                        |                          |                  |                  |
| $v_{abs}^{max}$ [ $cm^{-1}$ ]                                | 22783±57               | 257±165                  | 0.1254           | 17               |
| $v_{fluo}^{max}$ [ $cm^{-1}$ ]                               | 21993±181<br>20657±373 | -12778±747<br>-3829±513  | 0.9544<br>0.9653 | 16<br>4 (protic) |
| $\Delta v = v_{abs}^{max} - v_{fluo}^{max}$<br>[ $cm^{-1}$ ] | 854±181<br>924±637     | 12588±747<br>6182±876    | 0.9530<br>0.9614 | 16<br>4 (protic) |
| $\phi$                                                       | 0.76±0.06<br>1.43±0.07 | -0.76±0.23<br>-1.63±0.10 | 0.4354<br>0.9899 | 16<br>4 (protic) |
| $\tau$ [ns]                                                  | 3.09±0.18<br>8.90±0.03 | 2.77±0.76<br>-9.00±0.04  | 0.4857<br>0.9999 | 16<br>3 (protic) |
| $k_f * 10^{-8}$ [ $s^{-1}$ ]                                 | 2.41±0.08<br>2.95±0.02 | -3.42±0.35<br>-2.65±0.03 | 0.8736<br>0.9998 | 16<br>3 (protic) |
| $k_{nr} * 10^{-8}$ [ $s^{-1}$ ]                              | 8.97±1.91              | 9.98±7.91                | 0.1021           | 16               |
| $\mu * 10^5$ [ $cm^3/s$ ]                                    | 1.00±0.04<br>1.19±0.03 | -1.43±0.15<br>-0.99±0.04 | 0.8601<br>0.9984 | 16<br>3 (protic) |

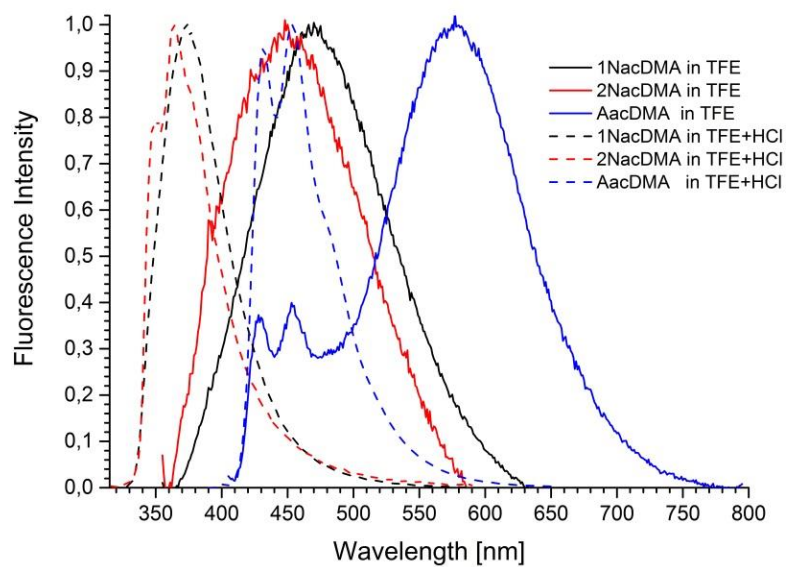

Fig. 1 ESI Fluorescence spectra of 1NacDMA, 2NacDMA and AacDMA measured in TFE and acidified TFE (3 ml TFE+1  $\mu$ l concentrated HCl)

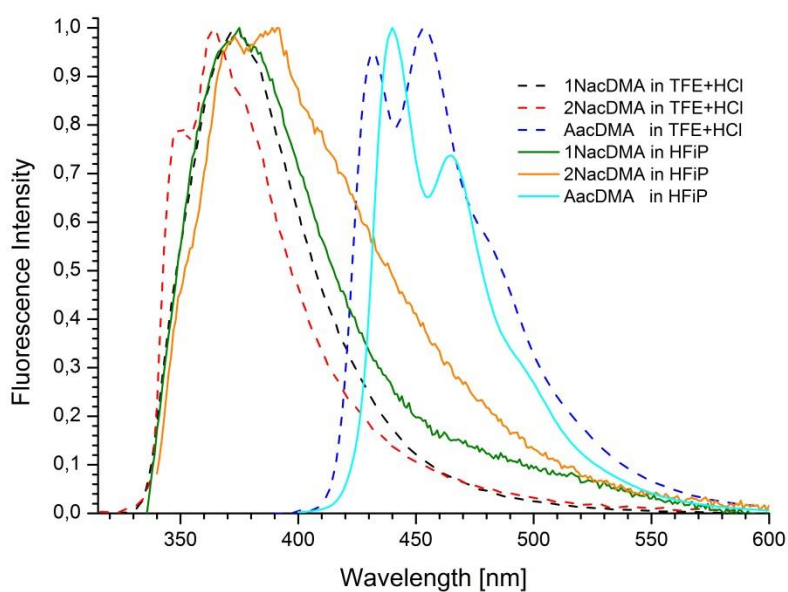

Fig. 2 ESI Fluorescence spectra of 1NacDMA, 2NacDMA and AacDMA measured in acidified TFE (3 ml TFE+1  $\mu$ l concentrated HCl) and HFIP.

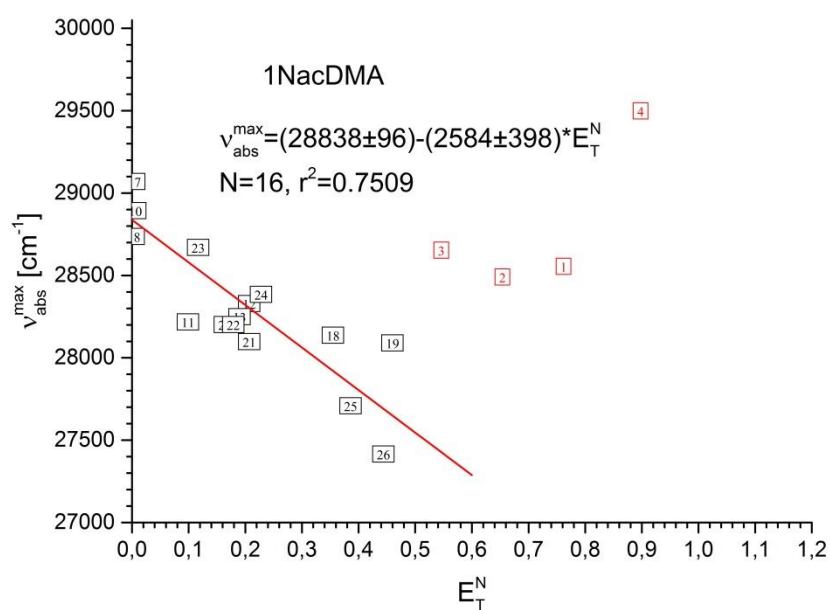

Fig. 3 ESI Plot of the correlation of  $\nu_{abs}^{max}$  versus  $E_T^N$  for 1NacDMA. The red points were not taken into account in the correlation. Numbers in the squares correspond to the order of the solvents in Tables 1-3 in the main text of publication.

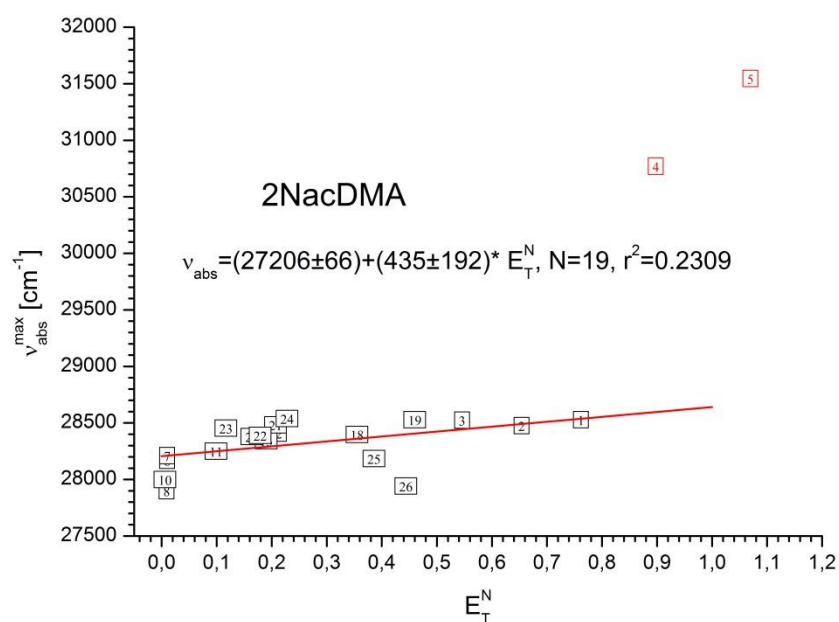

Fig. 4 ESI Plot of the correlation of  $\nu_{abs}^{max}$  versus  $E_T^N$  for 2NacDMA. The red points were not taken into account in the correlation. Numbers in the squares correspond to the order of the solvents in Tables 1-3 in the main text of publication.

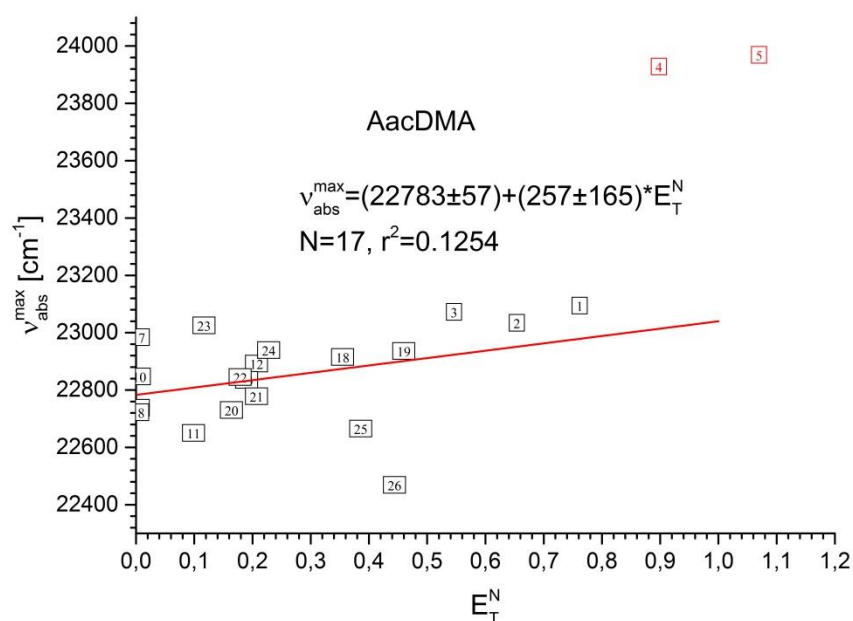

Fig. 5 ESI Fig. 4 ESI Plot of the correlation of  $\nu_{abs}^{max}$  versus  $E_T^N$  for AacDMA. The red points were not taken into account in the correlation. Numbers in the squares correspond to the order of the solvents in Tables 1-3 in the main text of publication.

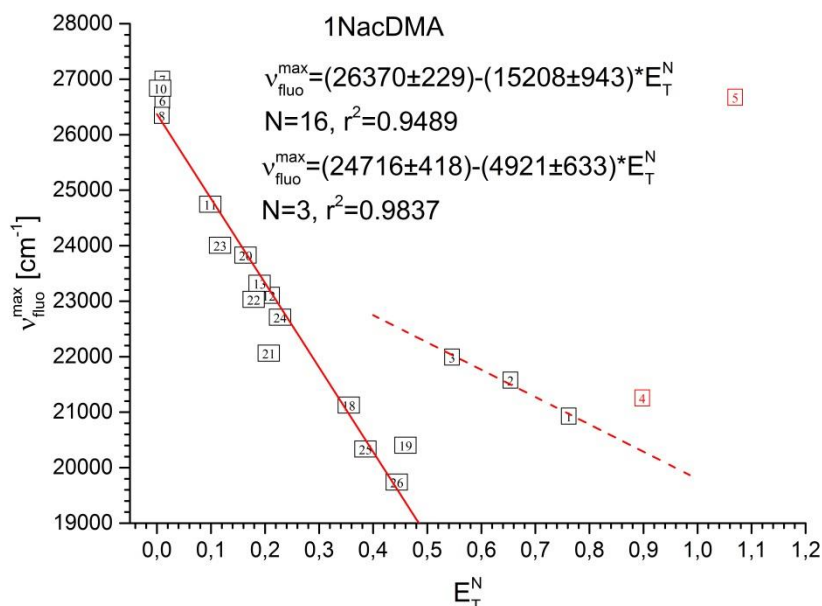

Fig. 6 ESI Plot of the correlation of  $\nu_{fluo}^{max}$  versus  $E_T^N$  for 1NacDMA. Solid line for aprotic solvents, dashed line for protic solvents. The red points were not taken into account in the correlation. Numbers in the squares correspond to the order of the solvents in Tables 1-3 in the main text of publication.

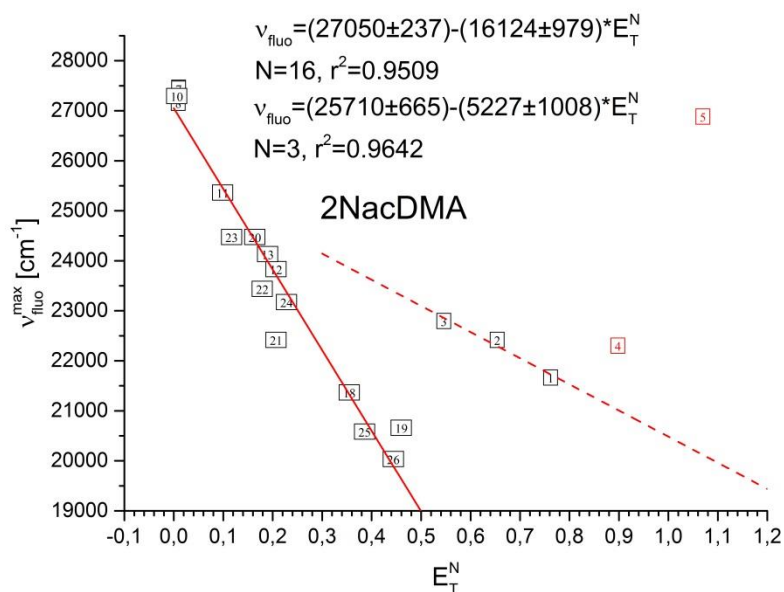

Fig. 7 ESI Plot of the correlation of  $v_{\text{fluo}}^{\text{max}}$  versus  $E_T^N$  for 2NacDMA. Solid line for aprotic solvents, dashed line for protic solvents. The red points were not taken into account in the correlation. Numbers in the squares correspond to the order of the solvents in Tables 1-3 in the main text of publication.

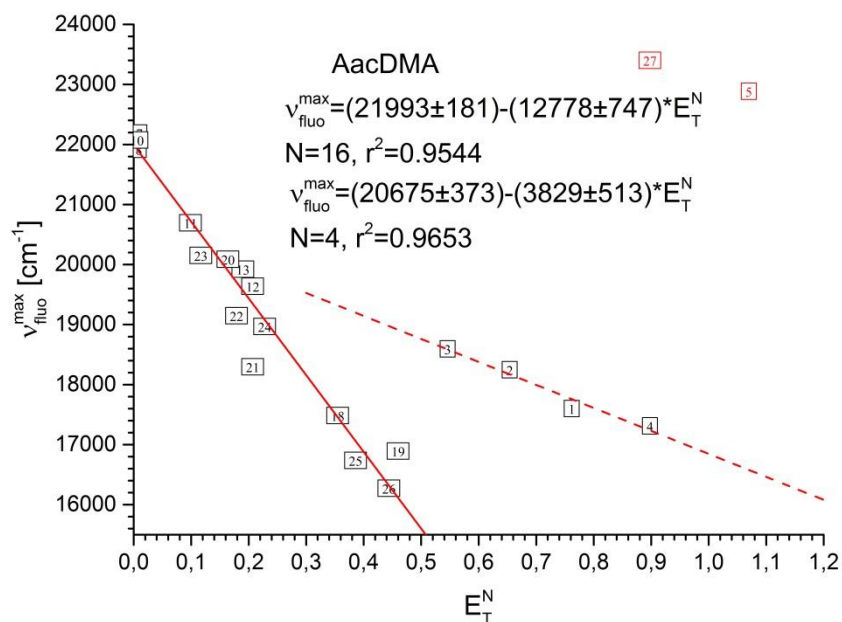

Fig. 8 ESI Plot of the correlation of  $v_{\text{fluo}}^{\text{max}}$  versus  $E_T^N$  for AacDMA. Solid line for aprotic solvents, dashed line for protic solvents. The red points were not taken into account in the correlation. Numbers in the squares correspond to the order of the solvents in Tables 1-3 in the main text of publication.



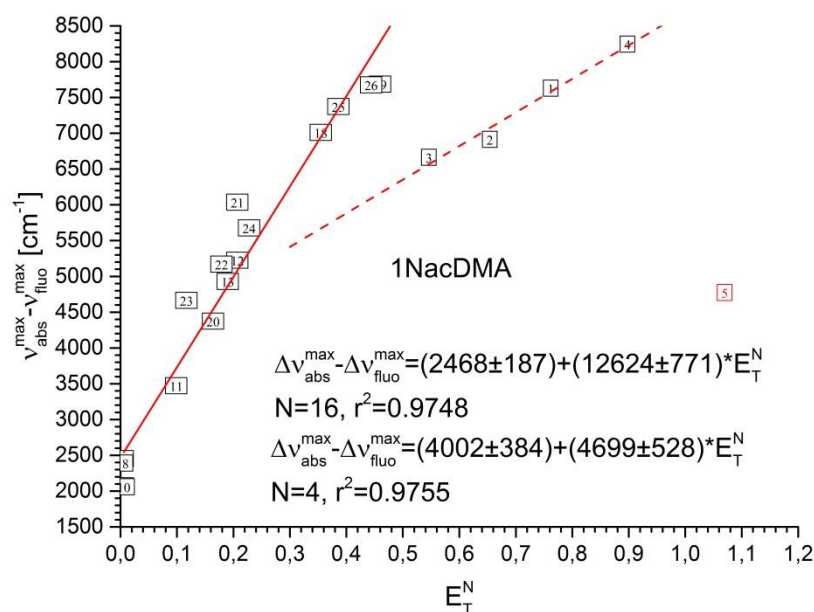

Fig. 9 ESI Plot of the correlation of  $\nu_{\text{abs}}^{\text{max}} - \nu_{\text{fluo}}^{\text{max}}$  versus  $E_T^N$  for 1NacDMA. Solid line for aprotic solvents, dashed line for protic solvents. The red points were not taken into account in the correlation. Numbers in the squares correspond to the order of the solvents in Tables 1-3 in the main text of publication.

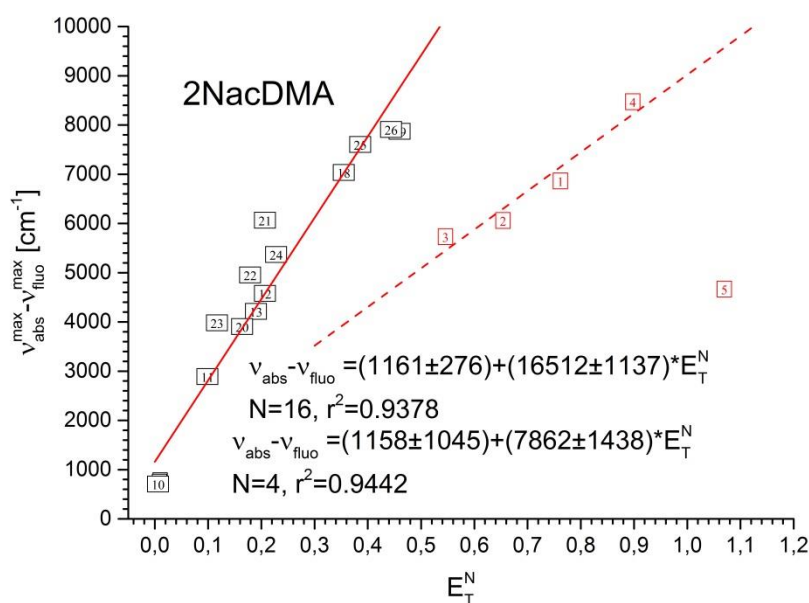

Fig. 10 ESI Plot of the correlation of  $\nu_{\text{abs}}^{\text{max}} - \nu_{\text{fluo}}^{\text{max}}$  versus  $E_T^N$  for 2NacDMA. Solid line for aprotic solvents, dashed line for protic solvents. The red points were not taken into account in the correlation. Numbers in the squares correspond to the order of the solvents in Tables 1-3 in the main text of publication.

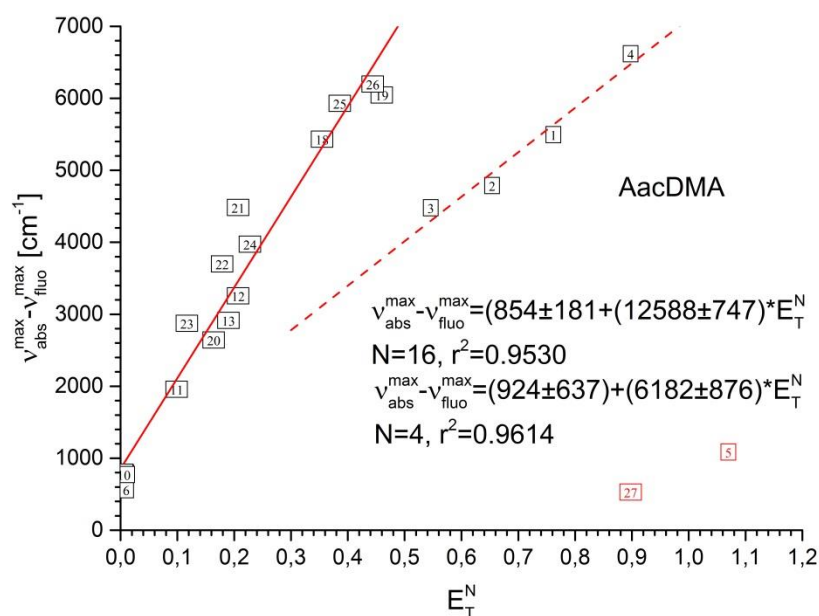

Fig. 11 ESI Plot of the correlation of  $\nu_{\text{abs}}^{\text{max}} - \nu_{\text{fluo}}^{\text{max}}$  versus  $E_T^N$  for AacDMA. Solid line for aprotic solvents, dashed line for protic solvents. The red points were not taken into account in the correlation. Numbers in the squares correspond to the order of the solvents in Tables 1-3 in the main text of publication.

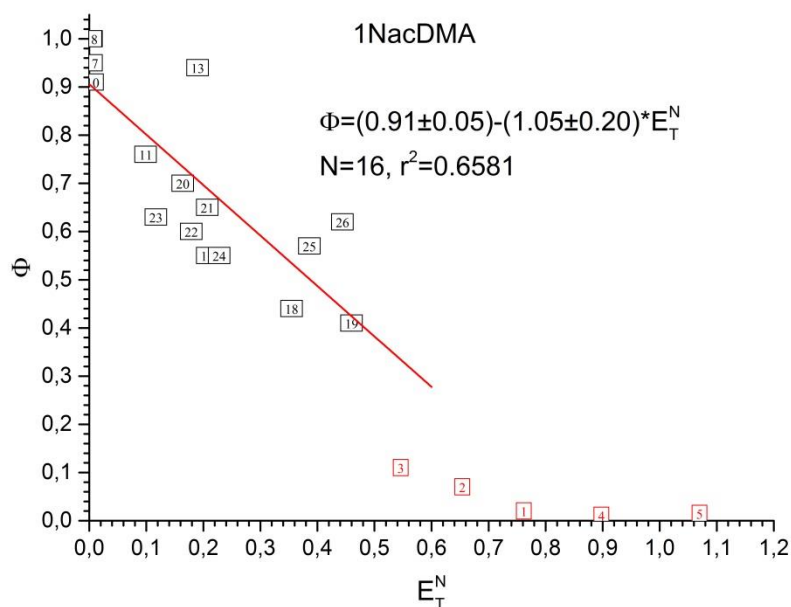

Fig. 12 ESI Plot of the correlation of fluorescence quantum yields ( $\Phi$ ) versus  $E_T^N$  for 1NacDMA. The red points were not taken into account in the correlation. Numbers in the squares correspond to the order of the solvents in Tables 1-3 in the main text of publication.

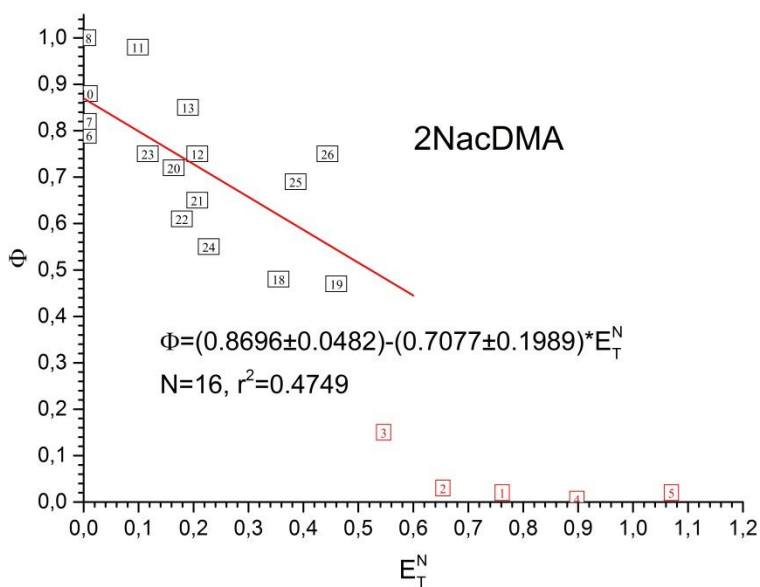

Fig. 13 ESI Plot of the correlation of fluorescence quantum yields ( $\Phi$ ) versus  $E_T^N$  for 2NacDMA. The red points were not taken into account in the correlation. Numbers in the squares correspond to the order of the solvents in Tables 1-3 in the main text of publication.

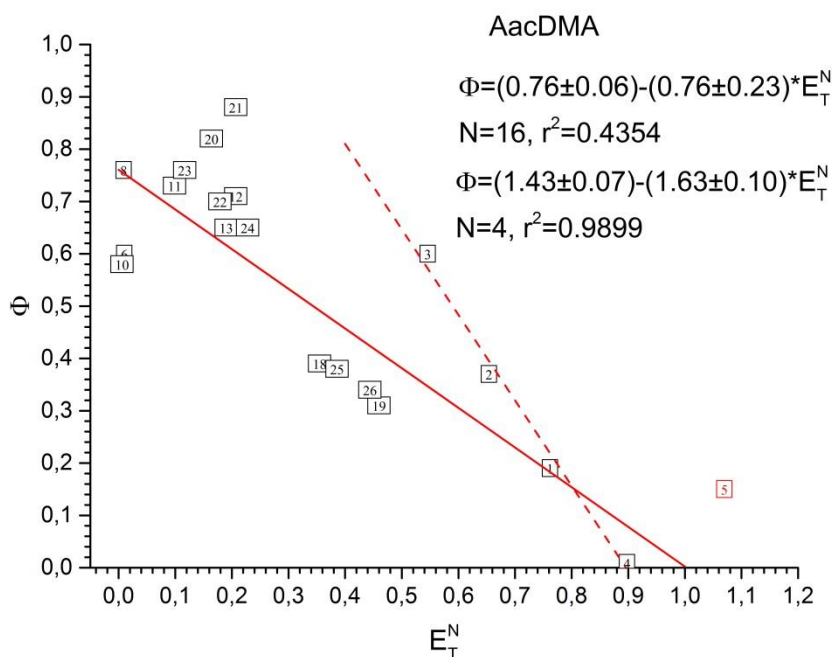

Fig. 14 ESI Plot of the correlation of fluorescence quantum yields ( $\Phi$ ) versus  $E_T^N$  for AacDMA. Solid line for aprotic solvents, dashed line for protic solvents. The red points were not taken into account in the correlation. Numbers in the squares correspond to the order of the solvents in Tables 1-3 in the main text of publication.

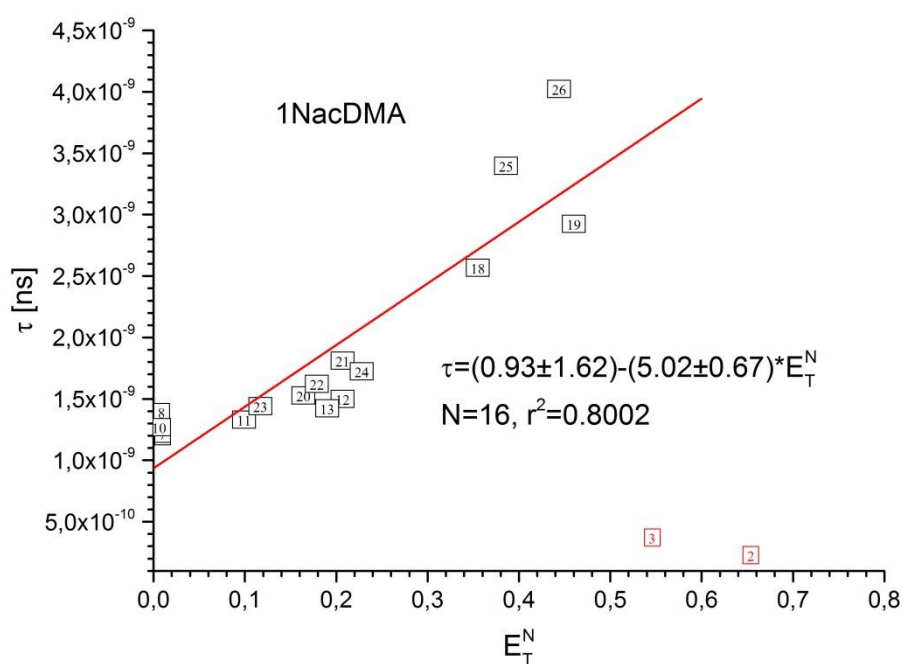

Fig. 15 ESI Plot of the correlation of fluorescence lifetimes ( $\tau$ ) versus  $E_T^N$  for 1NacDMA. The red points were not taken into account in the correlation. Numbers in the squares correspond to the order of the solvents in Tables 1-3 in the main text of publication.

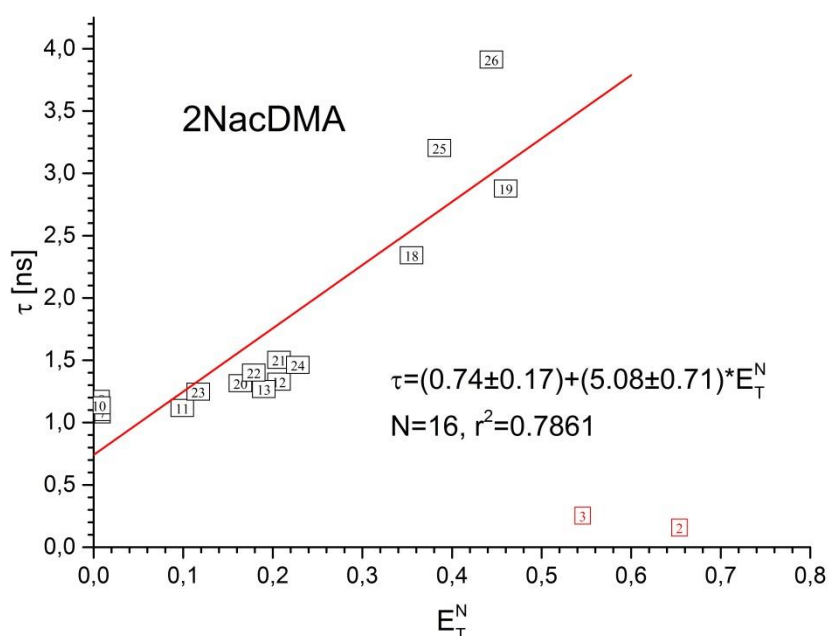

Fig. 16 ESI Plot of the correlation of fluorescence lifetimes ( $\tau$ ) versus  $E_T^N$  for 2NacDMA. The red points were not taken into account in the correlation. Numbers in the squares correspond to the order of the solvents in Tables 1-3 in the main text of publication.

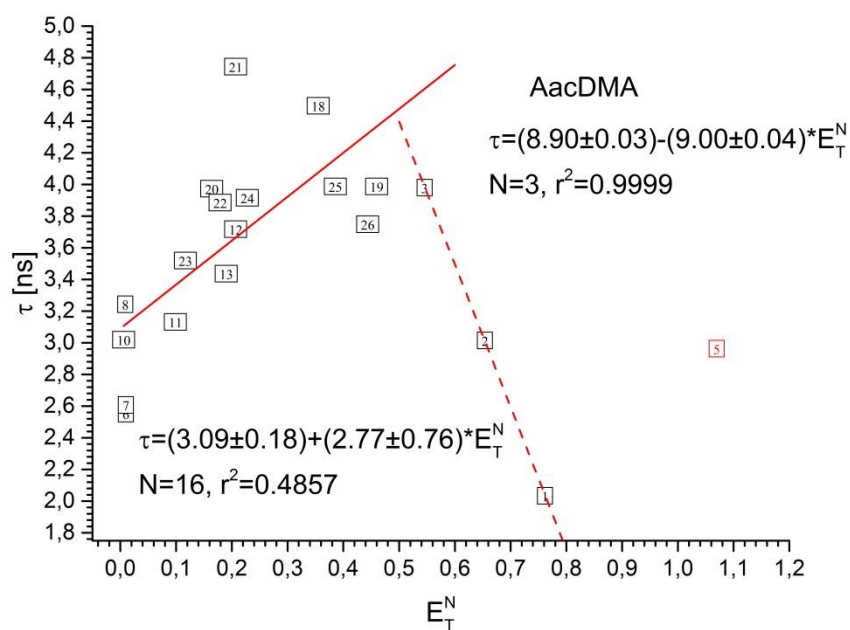

Fig. 17 ESI Plot of the correlation of fluorescence lifetimes ( $\tau$ ) versus  $E_T^N$  for AacDMA. Solid line for aprotic solvents, dashed line for protic solvents. The red points were not taken into account in the correlation. Numbers in the squares correspond to the order of the solvents in Tables 1-3 in the main text of publication.

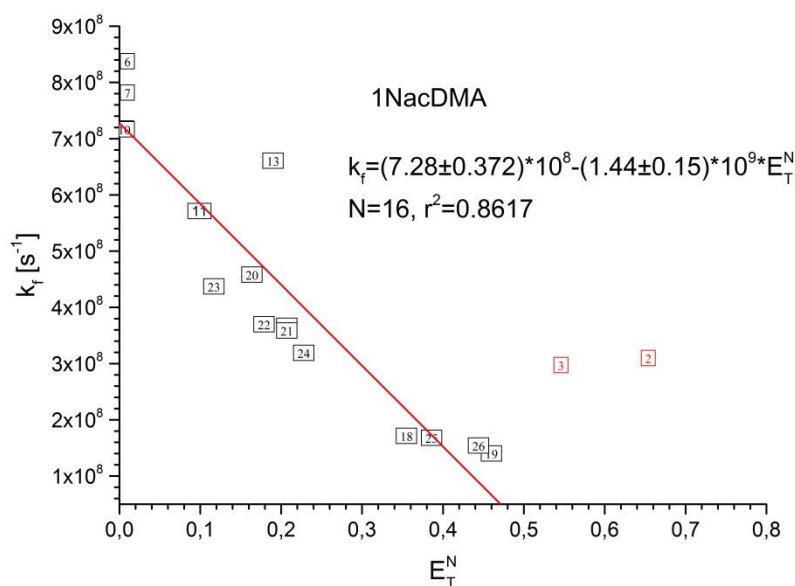

Fig. 18 ESI Plot of the correlation of fluorescence rate constants ( $k_f$ ) versus  $E_T^N$  for 1NacDMA. The red points were not taken into account in the correlation. Numbers in the squares correspond to the order of the solvents in Tables 1-3 in the main text of publication.

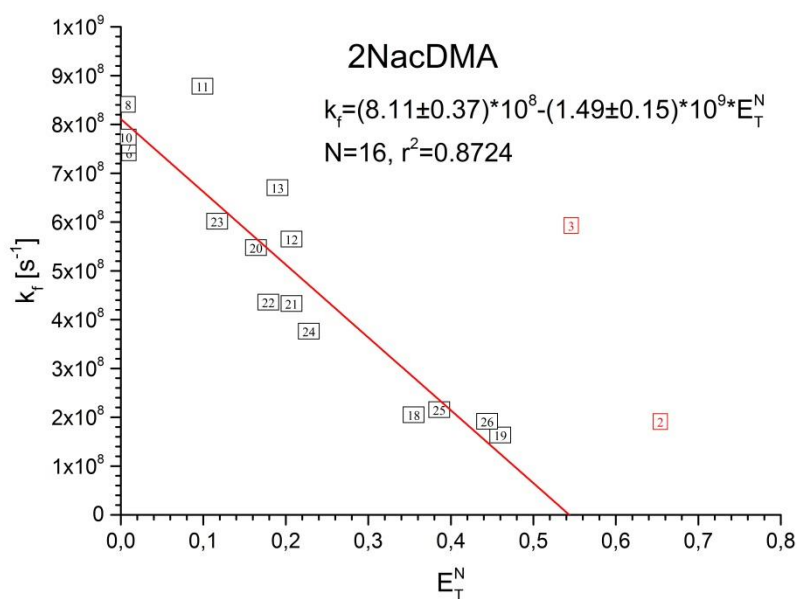

Fig. 19 ESI Plot of the correlation of fluorescence rate constants ( $k_f$ ) versus  $E_T^N$  for 2NacDMA. The red points were not taken into account in the correlation. Numbers in the squares correspond to the order of the solvents in Tables 1-3 in the main text of publication.

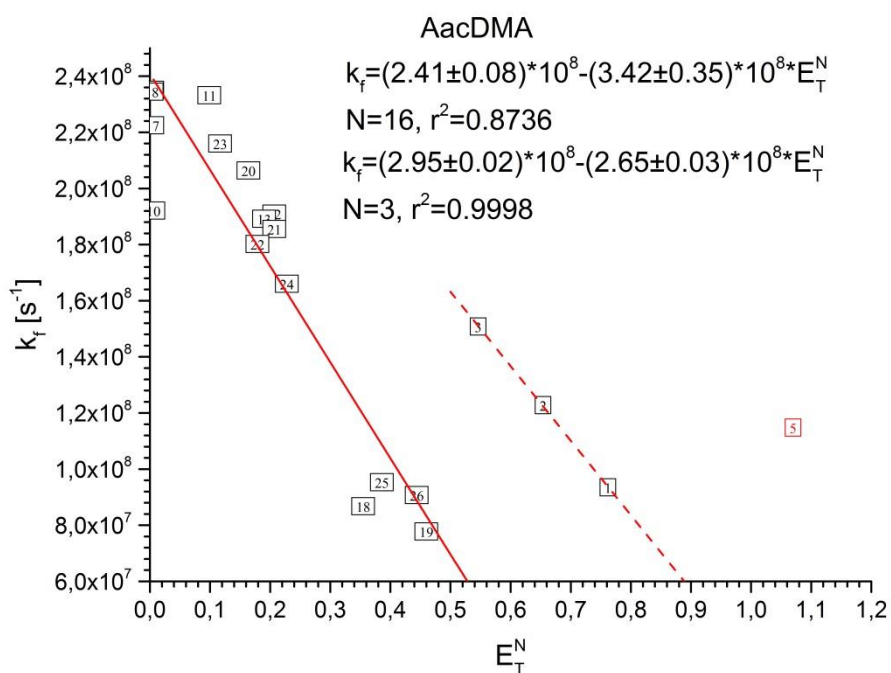

Fig. 20 ESI Plot of the correlation of fluorescence rate constants ( $k_f$ ) versus  $E_T^N$  for AacDMA. Solid line for aprotic solvents, dashed line for protic solvents. The red points were not taken into account in the correlation. Numbers in the squares correspond to the order of the solvents in Tables 1-3 in the main text of publication.

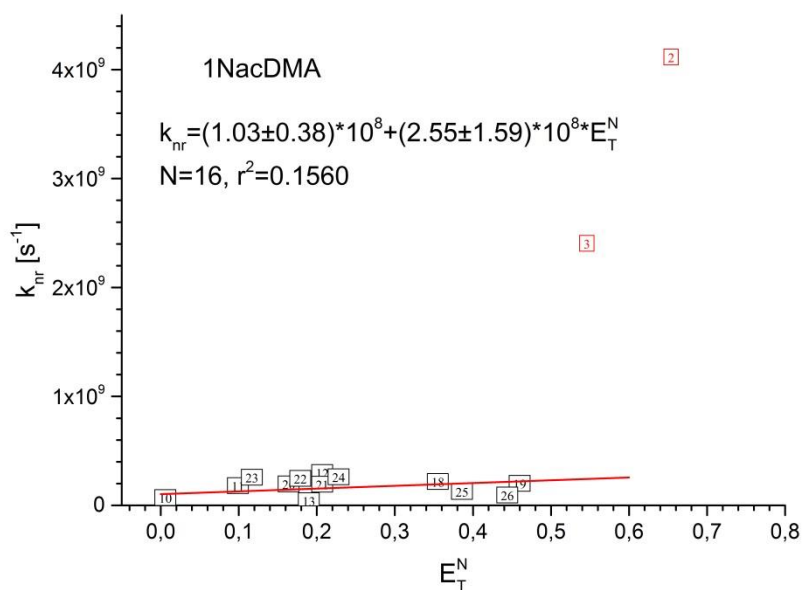

Fig. 21 ESI Plot of the correlation of non-radiative rate constants ( $k_{nr}$ ) versus  $E_T^N$  for 1NacDMA. The red points were not taken into account in the correlation. Numbers in the squares correspond to the order of the solvents in Tables 1-3 in the main text of publication.

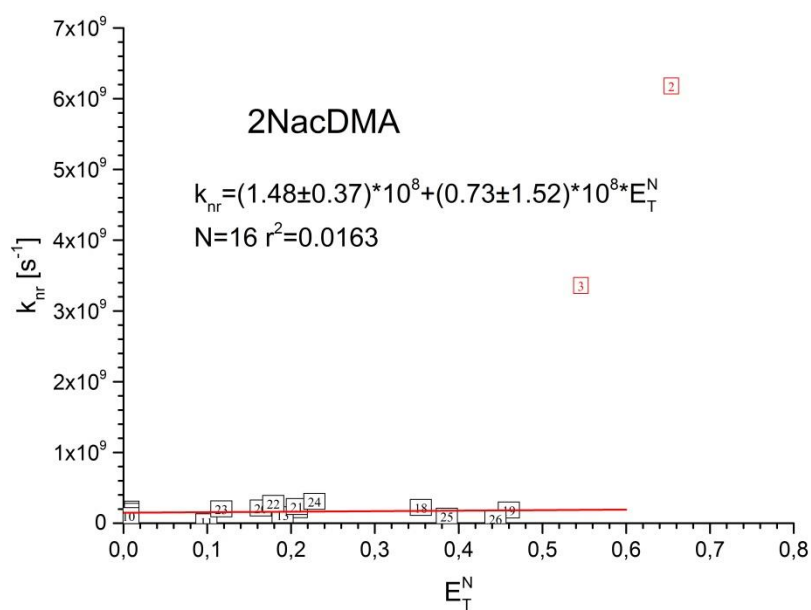

Fig. 22 ESI Plot of the correlation of non-radiative rate constants ( $k_{nr}$ ) versus  $E_T^N$  for 2NacDMA. The red points were not taken into account in the correlation. Numbers in the squares correspond to the order of the solvents in Tables 1-3 in the main text of publication.

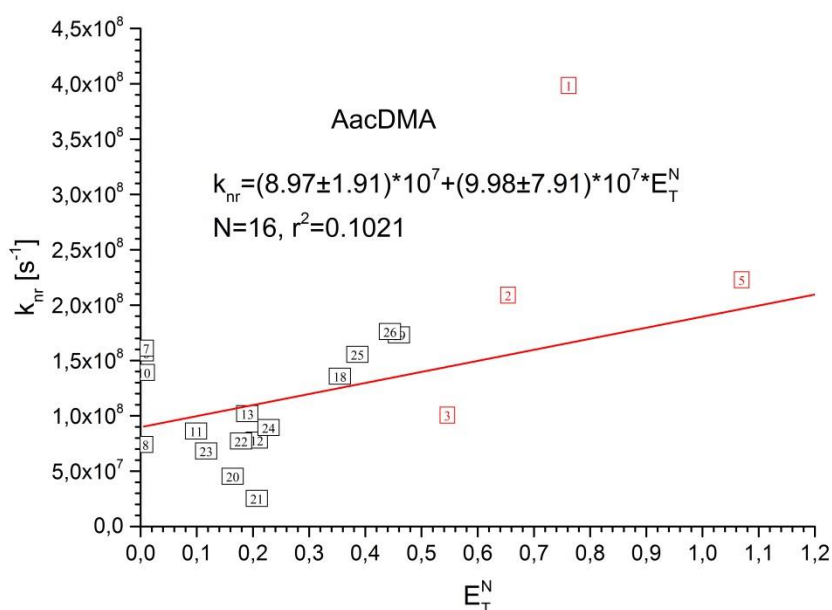

Fig. 23 ESI Plot of the correlation non-radiative rate constants ( $k_{nr}$ ) versus  $E_T^N$  for AacDMA. Solid line for aprotic solvents, dashed line for protic solvents. The red points were not taken into account in the correlation. Numbers in the squares correspond to the order of the solvents in Tables 1-3 in the main text of publication.

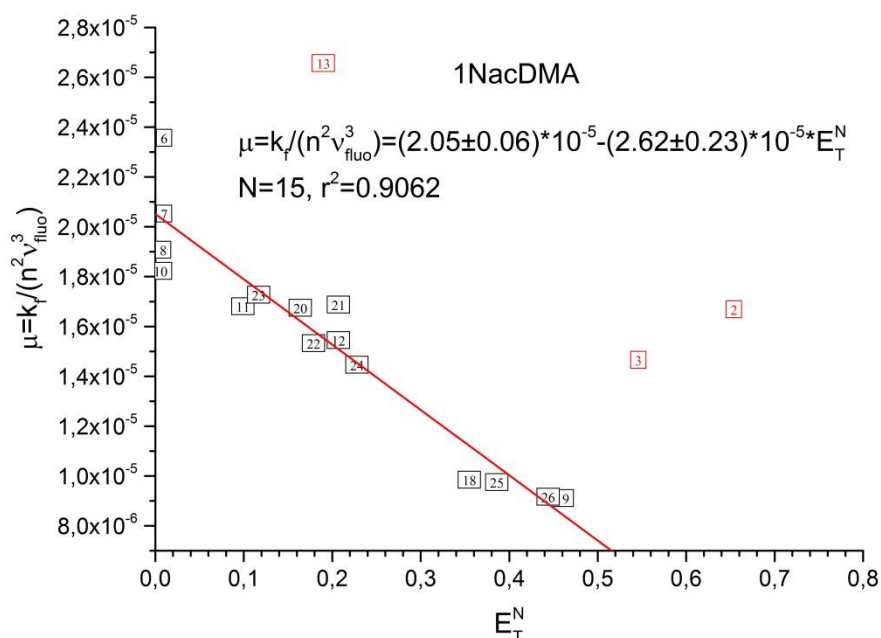

Fig. 24 ESI Plot of the correlation of transition dipole moments ( $\mu$ ) versus  $E_T^N$  for 1NacDMA. The red points were not taken into account in the correlation. Numbers in the squares correspond to the order of the solvents in Tables 1-3 in the main text of publication.



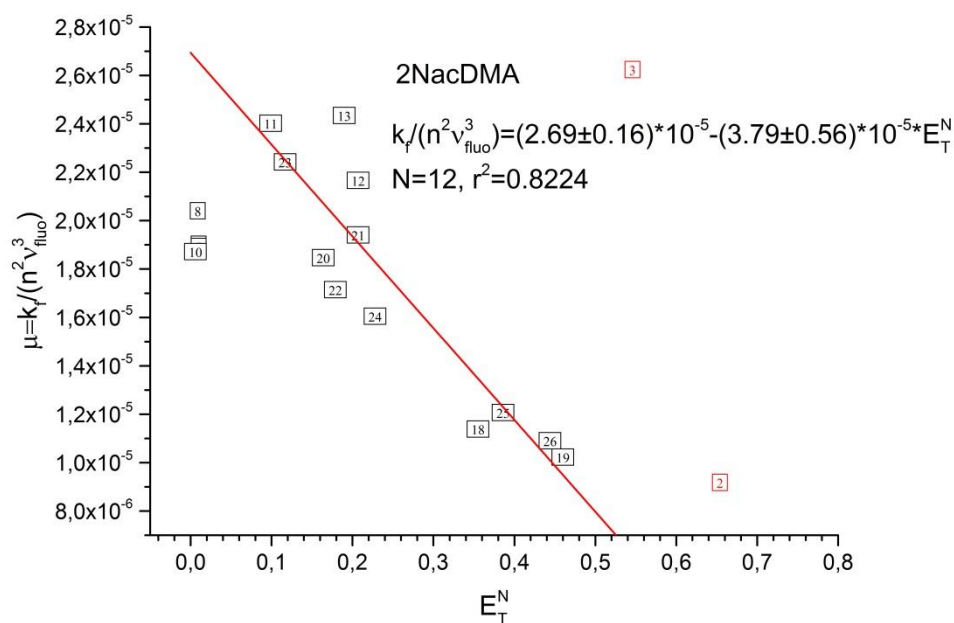

Fig. 25 ESI Plot of the correlation of transition dipole moments ( $\mu$ ) versus  $E_T^N$  for 2NacDMA. The red points were not taken into account in the correlation. Numbers in the squares correspond to the order of the solvents in Tables 1-3 in the main text of publication.

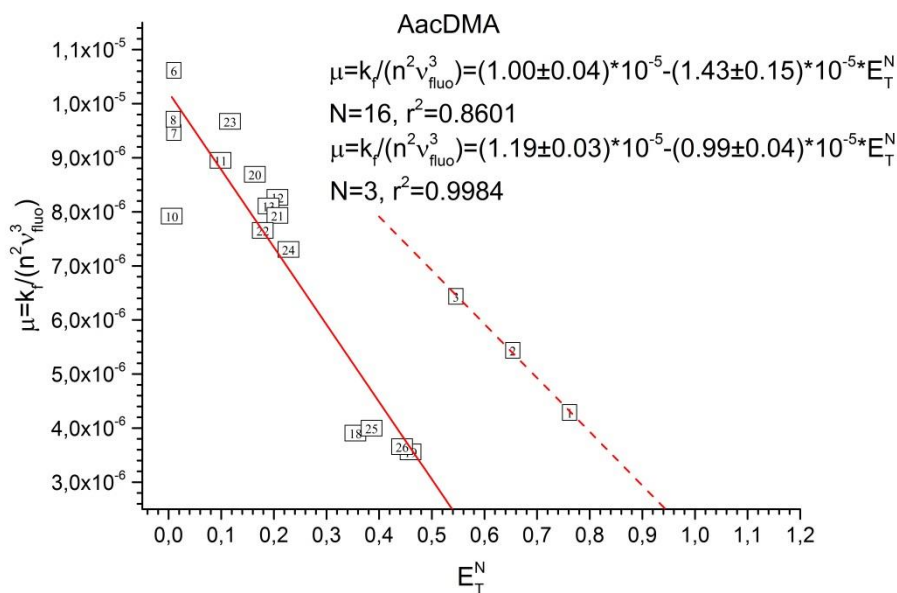

Fig. 26 ESI Plot of the correlation of transition dipole moments ( $\mu$ ) versus  $E_T^N$  for AacDMA. Solid line for aprotic solvents, dashed line for protic solvents. The red points were not taken into account in the correlation. Numbers in the squares correspond to the order of the solvents in Tables 1-3 in the main text of publication.

Table 4 ESI Estimated from eqn (5) adjusted coefficients ( $v_x$ )<sub>0</sub>,  $a_{SP}$ ,  $b_{SDP}$ ,  $c_{SB}$ ,  $d_{SA}$  their standard error and correlation coefficient ( $r^2$ ) of the multiple linear correlation analysis of absorption ( $v_{abs}$ ), fluorescence ( $v_{fluo}$ ) wavenumber, Stokes shift ( $\Delta v_{SS}$ ), fluorescence quantum yield ( $\phi$ ), fluorescence ( $k_f$ ) and nonradiative ( $k_{nr}$ ) rate constant and value proportional to squared transition dipole moment ( $\mu^2$ ) $\sim k_f/(n^2 v_{fluo}^3)$  of 1NacDMA as a function of Catalan-four parameter solvent scale. N.p. denote number of solvent using in the analysis.

|                                    | ( $v_x$ ) <sub>0</sub> | $a_{SP}$          | $b_{SDP}$        | $c_{SB}$         | $d_{SA}$         | $r^2$  | N.p. |
|------------------------------------|------------------------|-------------------|------------------|------------------|------------------|--------|------|
| $v_{abs}$ [ $cm^{-1}$ ]            | 31672 $\pm$ 378        | -4198 $\pm$ 553   | -786 $\pm$ 123   | -135 $\pm$ 161   | 379 $\pm$ 175    | 0.9471 | 20   |
|                                    | 31660 $\pm$ 374        | -4195 $\pm$ 548   | -859 $\pm$ 86    | -                | 775 $\pm$ 168    | 0.9446 | 20   |
| $v_{fluo}$ [ $cm^{-1}$ ]           | 29613 $\pm$ 2226       | -4320 $\pm$ 3256  | -5166 $\pm$ 728  | 1940 $\pm$ 947   | 1755 $\pm$ 1029  | 0.9229 | 20   |
| $\Delta v_{SS}$ [ $cm^{-1}$ ]      | 2964 $\pm$ 1898        | 122 $\pm$ 2276    | 4380 $\pm$ 620   | 1805 $\pm$ 808   | -1016 $\pm$ 877  | 0.9242 | 20   |
|                                    | 2145 $\pm$ 255         | -                 | 4385 $\pm$ 589   | 1805 $\pm$ 782   | -1040 $\pm$ 669  | 0.9241 | 20   |
| $\phi$                             | 0.38 $\pm$ 0.29        | 0.90 $\pm$ 0.42   | -0.26 $\pm$ 0.09 | -0.47 $\pm$ 0.12 | -0.68 $\pm$ 0.13 | 0.9350 | 20   |
| $\tau$ [ns]                        | -2.34 $\pm$ 1.57       | 5.10 $\pm$ 2.30   | 2.17 $\pm$ 0.55  | -0.94 $\pm$ 0.85 | -4.26 $\pm$ 1.42 | 0.7761 | 18   |
|                                    | -2.48 $\pm$ 1.58       | 5.15 $\pm$ 2,32   | 1.73 $\pm$ 0.32  | -                | -4.86 $\pm$ 1.33 | 0.7551 | 18   |
| $k_f \cdot 10^9$ [ $s^{-1}$ ]      | 8.24 $\pm$ 2.30        | -0.65 $\pm$ 3.37  | -4.93 $\pm$ 0.80 | -2.26 $\pm$ 1.24 | 2,02 $\pm$ 2.07  | 0.9229 | 18   |
|                                    | 7,72 $\pm$ 0.32        | -                 | -5.02 $\pm$ 0.76 | -1.71 $\pm$ 1.11 | -                | 0.9155 | 18   |
|                                    | 7.53 $\pm$ 3.04        | -                 | -5.95 $\pm$ 0.49 | -                | -                | 0.9022 | 18   |
| $k_{nr} \cdot 10^8$ [ $s^{-1}$ ]   | 11.67 $\pm$ 6.80       | -15.99 $\pm$ 9.94 | -2.76 $\pm$ 2.37 | 3.70 $\pm$ 3.67  | 89.90 $\pm$ 6.12 | 0.9655 | 18   |
|                                    | 12.99 $\pm$ 6.53       | -17.90 $\pm$ 9.35 | -                | -                | 90.54 $\pm$ 5.00 | 0.9618 | 18   |
| $\mu^2 \cdot 10^5$<br>[ $cm^3/s$ ] | 2.88 $\pm$ 1.06        | -1.07 $\pm$ 1.54  | -0.84 $\pm$ 0.37 | -0.30 $\pm$ 0.57 | 0.63 $\pm$ 0.95  | 0.6099 | 18   |
|                                    | 2.12 $\pm$ 0.13        | -                 | -0.96 $\pm$ 0.21 | -                | -                | 0.5685 | 18   |

Table 5 ESI Estimated from eqn (5) adjusted coefficients ( $v_x$ )<sub>0</sub>,  $a_{SP}$ ,  $b_{SDP}$ ,  $c_{SB}$ ,  $d_{SA}$  their standard error and correlation coefficient ( $r^2$ ) of the multiple linear correlation analysis of absorption ( $v_{abs}$ ), fluorescence ( $v_{fluo}$ ) wavenumber, Stokes shift ( $\Delta v_{SS}$ ), fluorescence quantum yield ( $\Phi$ ), fluorescence ( $k_f$ ) and nonradiative ( $k_{nr}$ ) rate constant and value proportional to squared transition dipole moment ( $\mu^2 \sim k_f / (n^2 v_{fluo}^3)$ ) of 2NacDMA as a function of Catalan-four parameter solvent scale. N.p. denote number of solvent using in the analysis.

|                               | ( $v_x$ ) <sub>0</sub> | $a_{SP}$   | $b_{SDP}$  | $c_{SB}$   | $d_{SA}$    | $r^2$  | N.p. |
|-------------------------------|------------------------|------------|------------|------------|-------------|--------|------|
| $v_{abs}$ [ $cm^{-1}$ ]       | 299099±1065            | -2474±155  | 636±348    | -766±453   | 1148±492    | 0.7214 | 20   |
| $v_{fluo}$ [ $cm^{-1}$ ]      | 29588±1531             | -3646±2214 | -64941±495 | 327±644    | -277±699    | 0.9682 | 20   |
|                               | 29129±1136             | -2900±1637 | -6412±287  | -          | -           | 0.9671 | 20   |
| $\Delta v_{SS}$ [ $cm^{-1}$ ] | 320±2063               | 1171±3018  | 7130±675   | -1094±878  | 1426±954    | 0.9525 | 20   |
|                               | 11131±279              | -          | 71841±642  | -1096±854  | 1198±730    | 0.9520 | 20   |
| $\Phi$                        | -0.23±0.26             | 1.73±0.39  | -0.19±0.09 | -0.42±0.11 | -0.63±0.11  | 0.9428 | 20   |
| $\tau$ [ns]                   | -2.40±1.67             | 4.95±2.44  | 2.29±0.58  | -1.17±0.90 | -3.81±1.50  | 0.7497 | 18   |
|                               | -2.57±1.70             | 5.00±2.50  | 1.73±0.40  | -          | -4.53±1.43  | 0.7171 | 18   |
| $k_f \cdot 10^8 [s^{-1}]$     | 4.84±3.94              | 5.29±5.75  | -6.45±1.37 | -2.03±2.12 | 1,07±3.54   | 0.8170 | 18   |
|                               | 8.42±4.76              | -          | -6.23±0.77 | -          | -           | 0.8061 | 18   |
| $k_{nr} \cdot 10^9 [s^{-1}]$  | 2.02±1.03              | -2.74±1.50 | -0.43±0.36 | 0.32±0.56  | 13.58±0.93  | 0.9643 | 18   |
|                               | 2.07±1.47              | -2,75±1,47 | -0.28±0.23 | -          | 13.78±0.08  | 0.9634 | 18   |
|                               | 2.29±1.00              | -3.24±1.34 | -          | -          | 13.40±0.08  | 0.9597 | 18   |
| $\mu^2 \cdot 10^5$            | 1.98±1.44              | 0.19±2.10  | -1.21±0.50 | -0.82±0.78 | -0.48±1.30  | 0.3929 | 18   |
| [ $cm^3/s$ ]                  | 2.20±0.28              | -          | -0.81±0.28 | -          | -           | 0.3399 | 18   |
|                               | 0.39±1.09              | 2.58±1.59  | -0.48±0.40 | -0.18±0.56 | -12.65±5.54 | 0.6939 | 16   |
|                               | 0.43±1.04              | 2.49±1.51  | 0.58±0.25  | -          | -12.15±5.12 | 0,6909 | 16   |

Table 6 ESI Estimated from eqn (5) adjusted coefficients ( $v_x$ )<sub>0</sub>,  $a_{SP}$ ,  $b_{SDP}$ ,  $c_{SB}$ ,  $d_{SA}$  their standard error and correlation coefficient ( $r^2$ ) of the multiple linear correlation analysis of absorption ( $v_{abs}$ ), fluorescence ( $v_{fluo}$ ) wavenumber, Stokes shift ( $\Delta v_{SS}$ ), fluorescence quantum yield ( $\phi$ ), fluorescence ( $k_f$ ) and nonradiative ( $k_{nr}$ ) rate constant and value proportional to squared transition dipole moment ( $\mu^2 \sim k_f / (n^2 v_{fluo}^3)$ ) of AacDMA as a function of Catalan-four parameter solvent scale. N.p. denote number of solvent using in the analysis.

|                               | $(v_x)_0$  | $a_{SP}$   | $b_{SDP}$  | $c_{SB}$   | $d_{SA}$   | $r^2$   | N.p. |
|-------------------------------|------------|------------|------------|------------|------------|---------|------|
| $v_{abs}$ [ $cm^{-1}$ ]       | 24476±371  | -2434±543  | 147±121    | -189±158   | 504±172    | 0.8631  | 20   |
|                               | 24415±361  | -2349±516  | -          | -          | 584±142    | 0.8476  | 20   |
| $v_{fluo}$ [ $cm^{-1}$ ]      | 24334±1237 | -3426±1809 | -5092±404  | 269±526    | -423±572   | 0.9663  | 20   |
|                               | 23688±943  | -2409±1360 | -5076±238  | -          | -          | 0.96040 | 20   |
| $\Delta v_{SS}$ [ $cm^{-1}$ ] | 141±1263   | 992±1848   | 5239±413   | -457±538   | 927±584    | 0.9678  | 20   |
|                               | 761±160    | -          | 5035±271   | -          | 854±425    | 0.9656  | 20   |
| $\phi$                        | 0.54±0.37  | 0.22±0.54  | -0.48±0.12 | 0.43±0.16  | -0.37±0.17 | 0.7755  | 20   |
|                               | 0,70±0.05  | -          | -0.47±0.12 | 0.43±0.15  | -0.41±0.13 | 0.7730  | 20   |
| $\tau$ [ns]                   | 3.05±1.15  | -0.22±1.67 | 0.63±0.39  | 1.42±0.58  | -3.42±0.67 | 0.7598  | 19   |
|                               | 2.089±0.66 | -          | 0.62±0.37  | 1.42±0.56  | -3.38±0.58 | 0.7595  | 19   |
| $k_f \cdot 10^9 [s^{-1}]$     | 2.04±0.72  | 0.37±1.06  | -1.68±1.06 | 0.79±0.37  | -0.48±0.42 | 0.8649  | 19   |
|                               | 2.32±0.10  | -          | -1.71±0.24 | 0.67±0.36  | -          | 0.8436  | 19   |
| $k_{nr} \cdot 10^8 [s^{-1}]$  | 1.68±1.32  | -0.72±1.92 | 1.24±0.45  | -2.21±0.66 | 4.08±0.77  | 0.7858  | 19   |
|                               | 1.19±0.18  | -          | 1.20±0.43  | -2.21±0.64 | 4.22±0.67  | 0.7838  | 19   |
| $\mu^2 \cdot 10^5$            | 1.19±0.30  | -0.34±0.44 | -0.69±0.10 | 0.36±0.15  | -0.27±0.18 | 0.8624  | 19   |
| [ $cm^3/s$ ]                  | 0.97±0.04  | -          | -0.71±0.10 | 0.36±0.15  | -0.20±0.16 | 0.8565  | 19   |

Table 7 ESI Estimated from eqn (4) adjusted coefficients ( $v_x$ )<sub>0</sub>,  $a_{\pi^*}$ ,  $b_{\alpha}$ ,  $c_{\beta}$  their standard error and correlation coefficient ( $r^2$ ) of the multiple linear correlation analysis of absorption ( $v_{abs}$ ), fluorescence ( $v_{fluo}$ ) wavenumber, Stokes shift ( $\Delta v_{SS}$ ), fluorescence quantum yield ( $\Phi$ ), fluorescence ( $k_f$ ) and nonradiative ( $k_{nr}$ ) rate constant and value proportional to squared transition dipole moment ( $\mu^2 \sim k_f / (n^2 v_{fluo}^3)$ ) of 1NacDMA as a function of Kamlet-Taft parameter solvent scale. N.p. denote number of solvent using in the analysis.

|                                  | ( $v_x$ ) <sub>0</sub> | $a_{\pi^*}$ | $b_{\alpha}$ | $c_{\beta}$ | $r^2$  | N.p. |
|----------------------------------|------------------------|-------------|--------------|-------------|--------|------|
| $v_{abs}$ [ $cm^{-1}$ ]          | 28962±147              | -927±351    | 11677±142    | -866±315    | 0.8664 | 20   |
| $v_{fluo}$ [ $cm^{-1}$ ]         | 26662±400              | -4105±961   | 959±389      | -4455±862   | 0.8821 | 20   |
| $\Delta v_{SS}$ [ $cm^{-1}$ ]    | 2341±346               | 3178±830    | 208±336      | 3589±745    | 0.8651 | 20   |
|                                  | 2354±339               | 3385±747    | -            | 3458±701    | 0.8618 | 20   |
| $\Phi$                           | 0.93±0.04              | -0.11±0.10  | -0.48±0.04   | -0.50±0.09  | 0.9380 | 20   |
|                                  | 0.90±0.03              | -           | -0.50±0.04   | -0.56±0.07  | 0.9331 | 20   |
| $\tau$ [ns]                      | 0.92±0.25              | 2,08±0.82   | -2.31±0.72   | 0.38±0.97   | 0.7403 | 17   |
|                                  | 0.93±0.24              | 2.35±0.45   | -2.11±0.51   | -           | 0.7372 | 17   |
| $k_f \cdot 10^9$ [ $s^{-1}$ ]    | 7.57±0.40              | -3.88±1.33  | 0.42±1.15    | -4.05±1.56  | 0.8802 | 17   |
|                                  | 7.59±0.39              | -4,13±1.11  | -            | -3.66±1.11  | 0.8790 | 17   |
| $k_{nr} \cdot 10^8$ [ $s^{-1}$ ] | 0.67±1.47              | -1.20±4.88  | 37.77±4.25   | 2.00±5.76   | 0.9244 | 17   |
|                                  | 0.77±0.81              | -           | 38.81±2.68   | -           | 0.9237 | 17   |
| $\mu^2 \cdot 10^5$               | 2.16±0.15              | 0.59±0.49   | -0.40±0.43   | -0.89±0.58  | 0.6195 | 17   |
| [ $cm^3/s$ ]                     | 2.17±1.22              | 0.14±0.44   | -3.72±1.47   | -1.28±0.51  | 0.7825 | 15   |
|                                  | 2.14±0.11              | -           | -3.84±1.38   | -1.43±0.26  | 0.7804 | 15   |

Table 8 ESI Estimated from eqn (4) adjusted coefficients ( $v_x$ )<sub>0</sub>,  $a_{\pi^*}$ ,  $b_\alpha$ ,  $c_\beta$  their standard error and correlation coefficient ( $r^2$ ) of the multiple linear correlation analysis of absorption ( $v_{abs}$ ), fluorescence ( $v_{fluo}$ ) wavenumber, Stokes shift ( $\Delta v_{SS}$ ), fluorescence quantum yield ( $\phi$ ), fluorescence ( $k_f$ ) and nonradiative ( $k_{nr}$ ) rate constant and value proportional to squared transition dipole moment ( $\mu^2 \sim k_f / (n^2 v_{fluo}^3)$ ) of 2NacDMA as a function of Kamlet-Taft parameter solvent scale. N.p. denote number of solvent using in the analysis.

|                               | ( $v_x$ ) <sub>0</sub> | $a_{\pi^*}$ | $b_\alpha$   | $c_\beta$    | $R^2$  | N  |
|-------------------------------|------------------------|-------------|--------------|--------------|--------|----|
| $v_{abs}$ [ $cm^{-1}$ ]       | 28190±148              | 1008±356    | 1183±144     | -1217±319    | 0.8852 | 20 |
| $v_{fluo}$ [ $cm^{-1}$ ]      | 27351±537              | -5937±1288  | 455±521      | -2721±1155   | 0.8052 | 20 |
|                               | 27380±523              | -5486±1171  | -            | -3008±1099   | 0.7960 | 20 |
| $\Delta v_{SS}$ [ $cm^{-1}$ ] | 839±535                | 6945±1283   | 728±519      | 1450±1150    | 0.8282 | 20 |
| $\phi$                        | 0.850±0.050            | 0.098±0.102 | -0.527±0.049 | -0.485±0.108 | 0.9044 | 20 |
|                               | 0.873±0.041            | -           | -0.511±0.044 | -0.430±0.084 | 0.9004 | 20 |
| $\tau$ [ns]                   | 0.75±0.27              | 2.15±0.89   | -2.10±0.78   | 0.24±0.11    | 0.6932 | 17 |
| $k_f \cdot 10^9 [s^{-1}]$     | 8.08±0.70              | -3.39±2.32  | 0.05±2.02    | -3.39±2.74   | 0.6817 | 17 |
|                               | 8.08±0.67              | -4.00±1.92  | -            | -3.34±1.93   | 0.6816 | 17 |
| $k_{nr} \cdot 10^9 [s^{-1}]$  | 1.34±2.38              | -2.79±7.91  | 56.74±6.89   | 1.64±9.34    | 0.9104 | 17 |
|                               | 0.65±1.32              | -           | 57.34±4.68   | -            | 0.9092 | 17 |
| $\mu^2 \cdot 10^5$            | 2.16±0.22              | 0.82±0.74   | -0.06±0.65   | -0.07±0.88   | 0.2570 | 17 |
| [ $cm^3/s$ ]                  | 2.13±0.14              | 0.06±0.51   | -4.30±1.67   | 1.04±0.58    | 0.6410 | 15 |
|                               | 2.14±0.12              | -           | -4.26±1.56   | 0.98±0.30    | 0.6405 | 15 |

Table 9 ESI Estimated from eqn (4) adjusted coefficients ( $v_x$ )<sub>0</sub>,  $a_{\pi^*}$ ,  $b_{\alpha}$ ,  $c_{\beta}$  their standard errors and correlation coefficient ( $r^2$ ) of the multiple linear correlation analysis of absorption ( $v_{abs}$ ), fluorescence ( $v_{fluo}$ ) wavenumber, Stokes shift ( $\Delta v_{SS}$ ), fluorescence quantum yield ( $\phi$ ), fluorescence ( $k_f$ ) and nonradiative ( $k_{nr}$ ) rate constant and value proportional to squared transition dipole moment ( $\mu^2 \sim k_f / (n^2 v_{fluo}^3)$ ) of AacDMA as a function of Kamlet-Taft parameter solvent scale. N.p. denote number of solvent using in the analysis.

|                                  | ( $v_x$ ) <sub>0</sub> | $a_{\pi^*}$ | $b_{\alpha}$ | $c_{\beta}$ | $R^2$  | N  |
|----------------------------------|------------------------|-------------|--------------|-------------|--------|----|
| $v_{abs}$ [ $cm^{-1}$ ]          | 22882±66               | -15±159     | 573±64       | -279±143    | 0.8653 | 20 |
|                                  | 22878±54               | -           | 571±57       | -288±109    | 0.8652 | 20 |
| $v_{fluo}$ [ $cm^{-1}$ ]         | 22212±492              | -4500±1180  | 568±477      | -2489±1057  | 0.7608 | 20 |
| $\Delta v_{SS}$ [ $cm^{-1}$ ]    | 669±514                | 4485±1234   | 6±499        | 2210±1106   | 0.7354 | 20 |
|                                  | 669±498                | 4491±1096   | -            | 2206±1029   | 0.7354 | 20 |
| $\Phi$                           | 0.72±0.07              | -0.29±0.18  | -0.21±0.07   | 0.05±0.16   | 0.5120 | 20 |
|                                  | 0.72±0.07              | -0.25±0.14  | -0.21±0.07   | -           | 0.5089 | 20 |
| $\tau$ [ns]                      | 3.00±0.25              | 1.14±0.64   | -0.63±0.26   | 0.31±0.60   | 0.4400 | 19 |
|                                  | 3.02±0.24              | 1.36±0.46   | -0.64±0.26   | -           | 0.4299 | 19 |
| $k_f \cdot 10^8$ [ $s^{-1}$ ]    | 2.35±1.58              | -1.10±0.40  | -0.30±0.17   | -0.37±0.37  | 0.6688 | 19 |
|                                  | 2.33±1.58              | -1.37±0.30  | -0.29±0.17   | -           | 0.6470 | 19 |
| $k_{nr} \cdot 10^8$ [ $s^{-1}$ ] | 1.03±0.32              | -0.04±0.82  | 0.93±0.34    | 0.32±0.72   | 0.3634 | 19 |
|                                  | 1.12±0.18              | -           | 0.95±0.31    | -           | 0.3522 | 19 |
| $\mu^2 \cdot 10^5$               | 1.00±0.06              | -0.52±0.16  | 0.11±0.07    | -0.11±0.15  | 0.6945 | 19 |
| [ $cm^3/s$ ]                     | 1.00±0.06              | -0.60±0.12  | -0.10±0.06   | -           | 0.6838 | 19 |

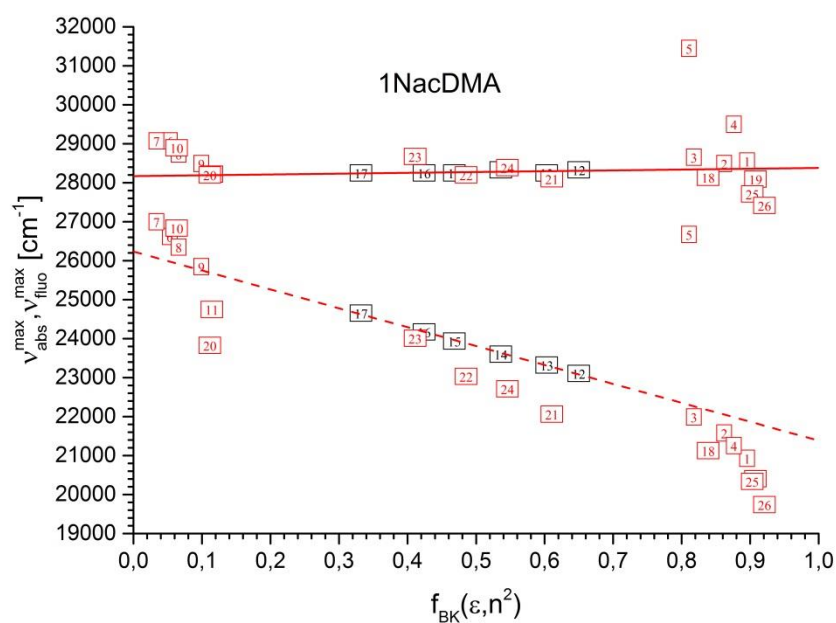

Fig. 27 ESI Plot of the correlation of  $\nu_{abs}^{max}$  and  $\nu_{fluo}^{max}$  versus Bilot-Kawski solvent polarity function  $f_{BK}(\epsilon, n^2)$  for 1NacDMA. Solid line represents the best fit for absorption, dashed line for emission. The black points denote 1-chloro-hydrocarbon solvents, red points other studied solvents. Numbers in the squares correspond to the order of the solvents in Tables 1-3 in the main text of publication.

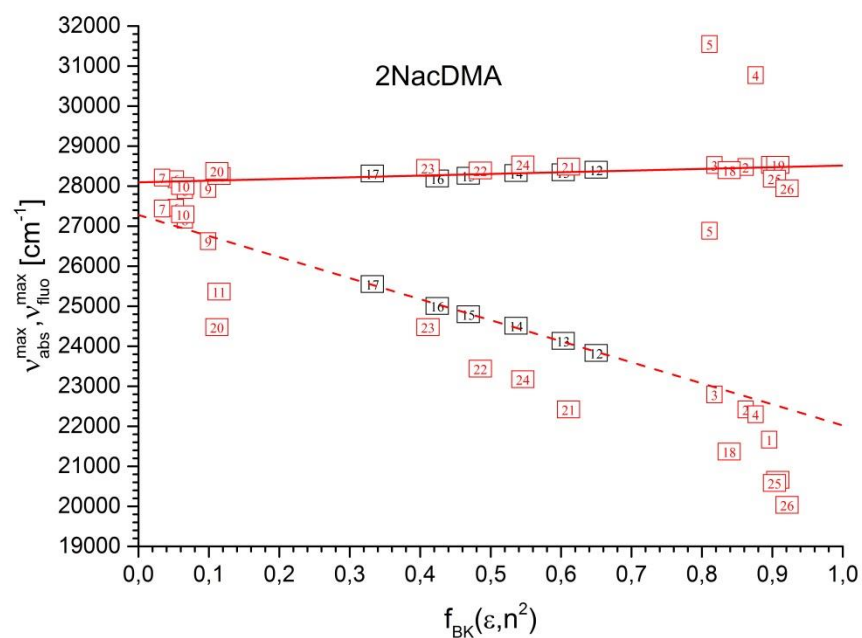

Fig. 28 ESI Plot of the correlation of  $\nu_{abs}^{max}$  and  $\nu_{fluo}^{max}$  versus Bilot-Kawski solvent polarity function  $f_{BK}(\epsilon, n^2)$  for 2NacDMA. Solid line represents the best fit for absorption, dashed line for emission. The black points denote 1-chloro-hydrocarbon solvents, red points other studied solvents. Numbers in the squares correspond to the order of the solvents in Tables 1-3 in the main text of publication.



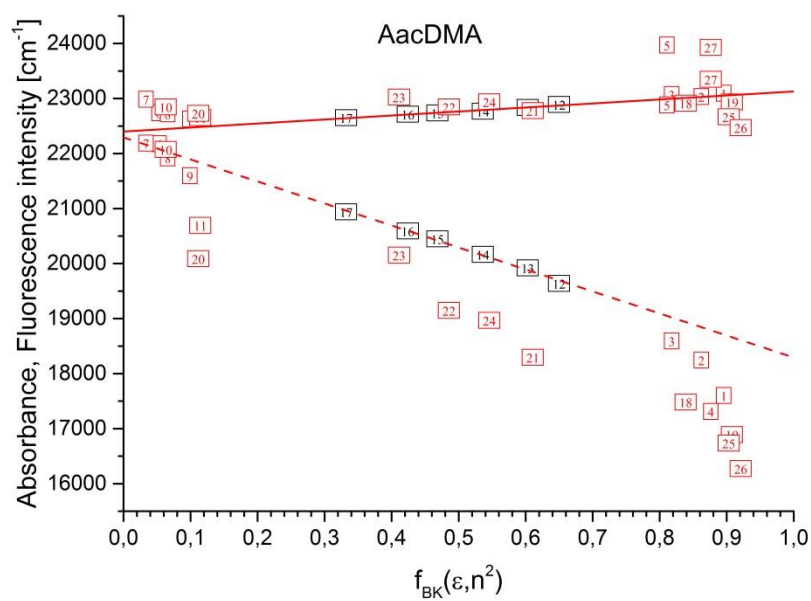

Fig. 29 ESI Plot of the correlation of  $\nu_{abs}^{max}$  and  $\nu_{fluor}^{max}$  versus Bilot-Kawski solvent polarity function  $f_{BK}(\epsilon, n^2)$  for AacDMA. Solid line represents the best fit for absorption, dashed line for emission. The black points denote 1-chloro-hydrocarbon solvents, red points other studied solvents. Numbers in the squares correspond to the order of the solvents in Tables 1-3 in the main text of publication.

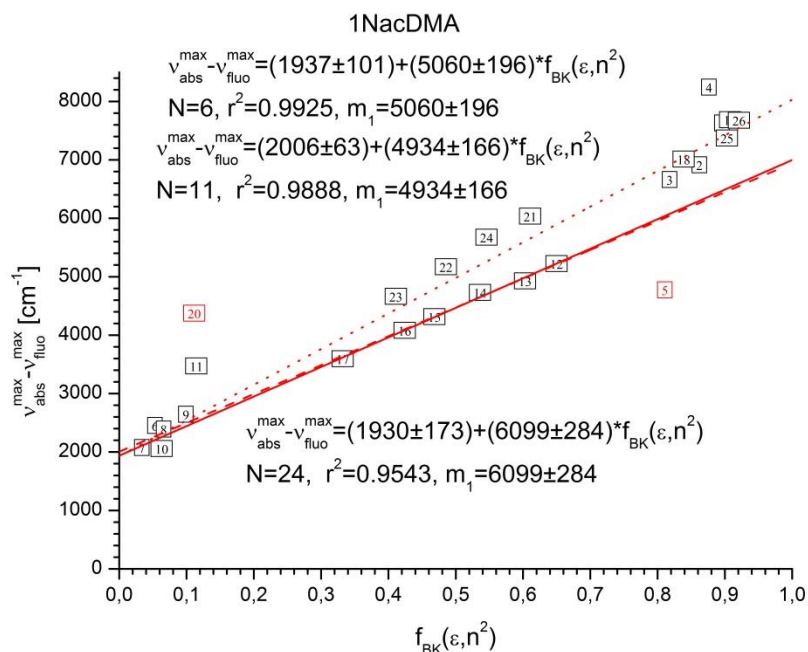

Fig. 30 ESI Plot of the correlation of  $v_{abs}^{max} - v_{fluo}^{max}$  versus Bilot-Kawski solvent polarity function  $f_{BK}(\epsilon, n^2)$  for 1NacDMA. Solid line represents the best fit for 1-chloro-hydrocarbon solvents, dashed line for 1-chloro-hydrocarbons and saturated hydrocarbon solvents, and dotted line for all solvents studied except 1,4-dioxane (20) and HFIP (5). Numbers in the squares correspond to the order of the solvents in Tables 1-3 in the main text of publication.

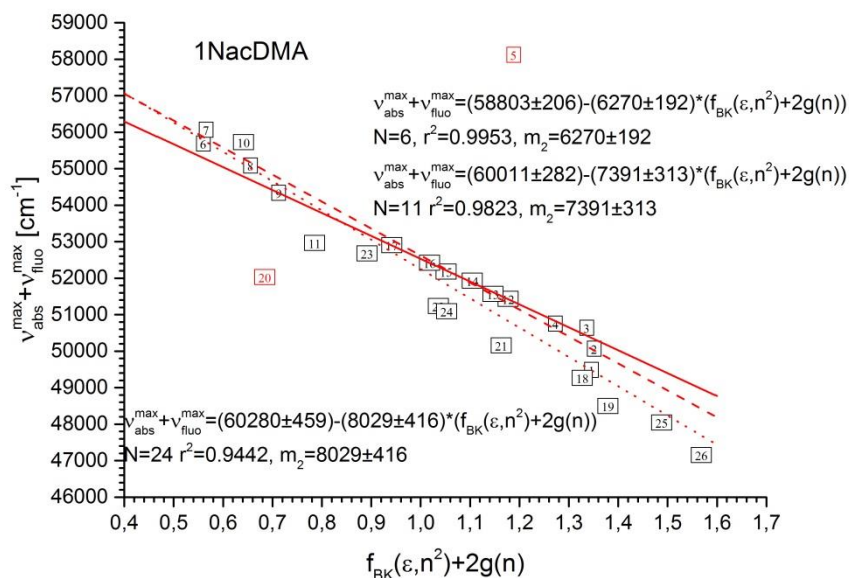

Fig. 31 ESI Plot of the correlation of  $v_{abs}^{max} + v_{fluo}^{max}$  versus Bilot-Kawski solvent polarity function  $f_{BK}(\epsilon, n^2) + 2g(n)$  for 1NacDMA. Solid line represents the best fit for 1-chloro-hydrocarbon solvents, dashed line for 1-chloro-hydrocarbons and saturated hydrocarbon solvents, and dotted line for all solvents studied except 1,4-dioxane (20) and HFIP (5). Numbers in the squares correspond to the order of the solvents in Tables 1-3 in the main text of publication.

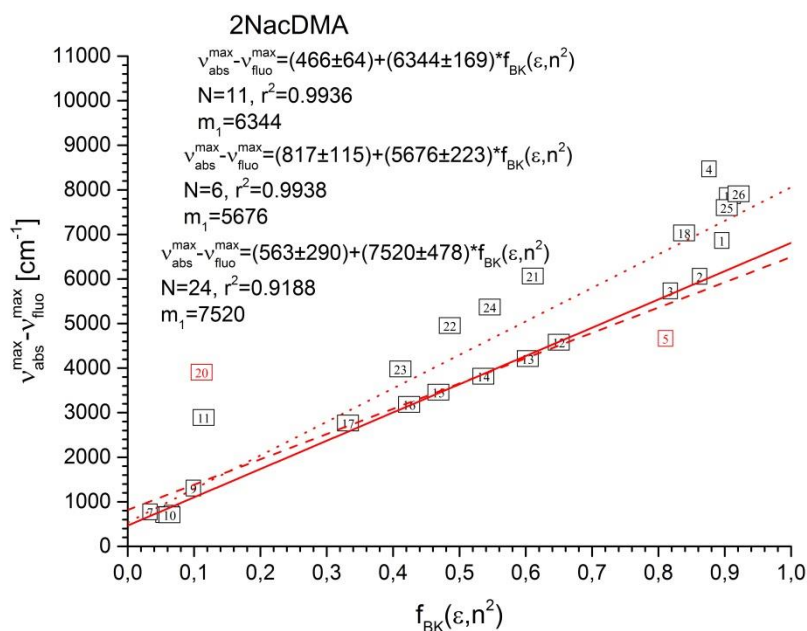

Fig. 32 ESI Plot of the correlation of  $\nu_{abs}^{max} - \nu_{fluo}^{max}$  versus Bilot-Kawski solvent polarity function  $f_{BK}(\epsilon, n^2)$  for 2NacDMA. Solid line represents the best fit for 1-chloro-hydrocarbon solvents, dashed line for 1-chloro-hydrocarbons and saturated hydrocarbon solvents, and dotted line for all solvents studied except 1,4-dioxane (20) and HFIP (5). Numbers in the squares correspond to the order of the solvents in Tables 1-3 in the main text of publication.

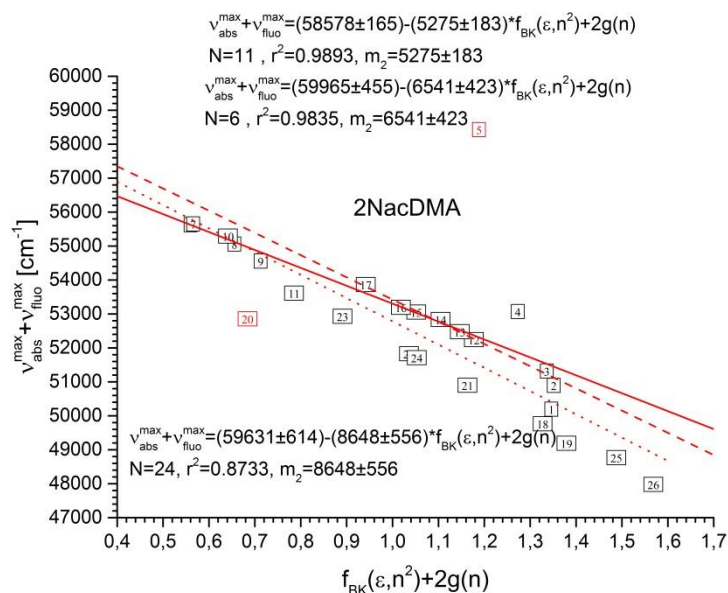

Fig. 33 ESI Plot of the correlation of  $\nu_{abs}^{max} + \nu_{fluo}^{max}$  versus Bilot-Kawski solvent polarity function  $f_{BK}(\epsilon, n^2) + 2g(n)$  for 2NacDMA. Solid line represents the best fit for 1-chloro-hydrocarbon solvents, dashed line for 1-chloro-hydrocarbons and saturated hydrocarbon solvents, and dotted line for all solvents studied except 1,4-dioxane (20) and HFIP (5). Numbers in the squares correspond to the order of the solvents in Tables 1-3 in the main text of publication.

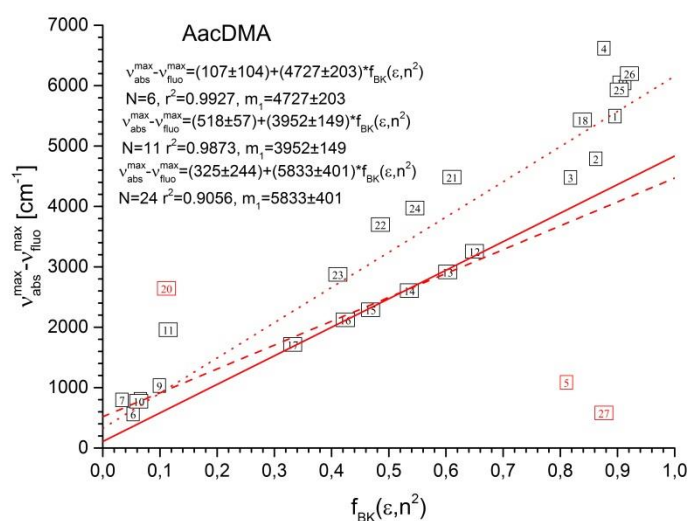

Fig. 34 ESI Plot of the correlation of  $v_{abs}^{max} - v_{fluo}^{max}$  versus Bilot-Kawski solvent polarity function  $f_{BK}(\epsilon, n^2)$  for AacDMA. Solid line represents the best fit for 1-chloro-hydrocarbon solvents, dashed line for 1-chloro-hydrocarbons and saturated hydrocarbon solvents, and dotted line for all solvents studied except 1,4-dioxane (20) and HFIP (5). Numbers in the squares correspond to the order of the solvents in Tables 1-3 in the main text of publication.

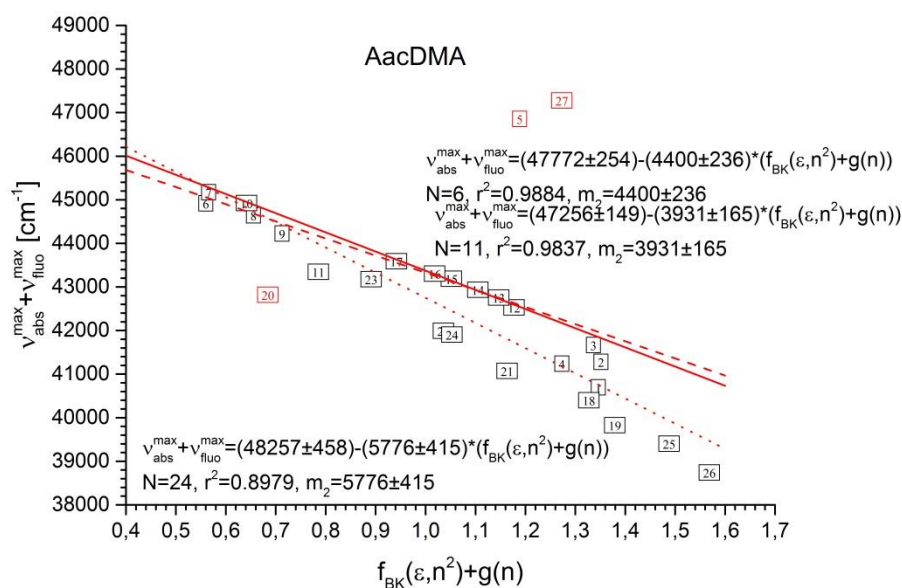

Fig. 35 ESI Plot of the correlation of  $v_{abs}^{max} + v_{fluo}^{max}$  versus Bilot-Kawski solvent polarity function  $f_{BK}(\epsilon, n^2) + 2g(n)$  for AacDMA. Solid line represents the best fit for 1-chloro-hydrocarbon solvents, dashed line for 1-chloro-hydrocarbons and saturated hydrocarbon solvents, and dotted line for all solvents studied except 1,4-dioxane (20) and HFIP (5) and short wavelength band in TFE (27). Numbers in the squares correspond to the order of the solvents in Tables 1-3 in the main text of publication.

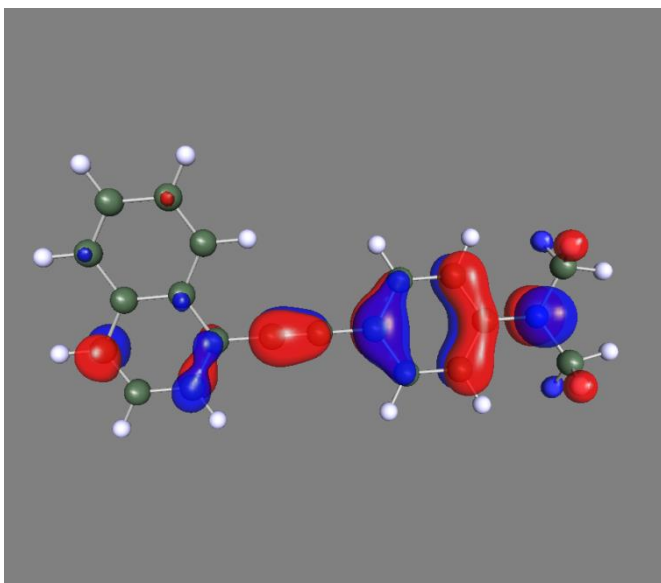

Fig. 36 ESI HOMO orbital of 1NacDMA

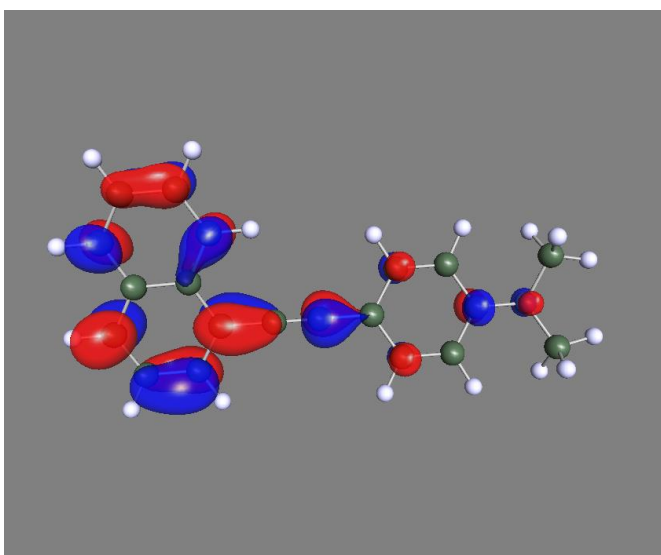

Fig. 37 ESI LUMO orbital of 1NacDMA

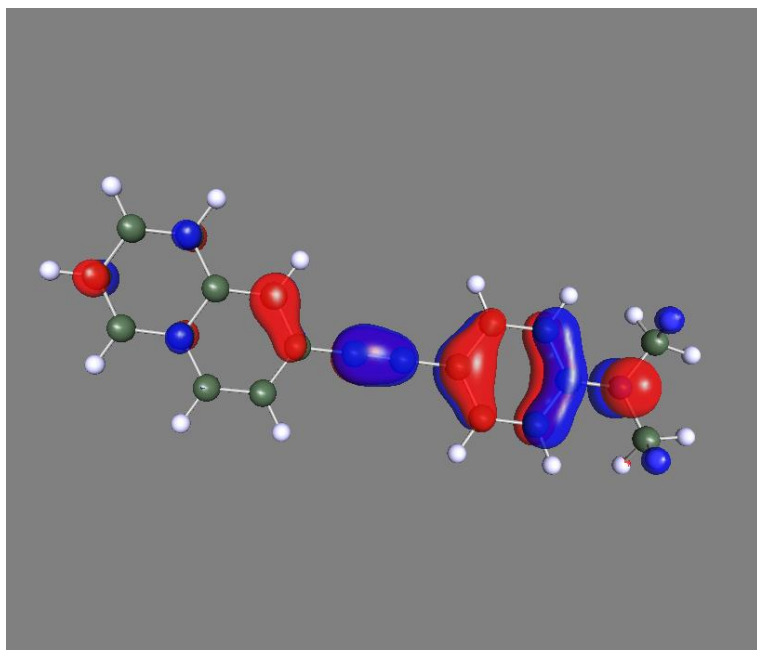

Fig. 38 ESI HOMO orbital of 2NacDMA

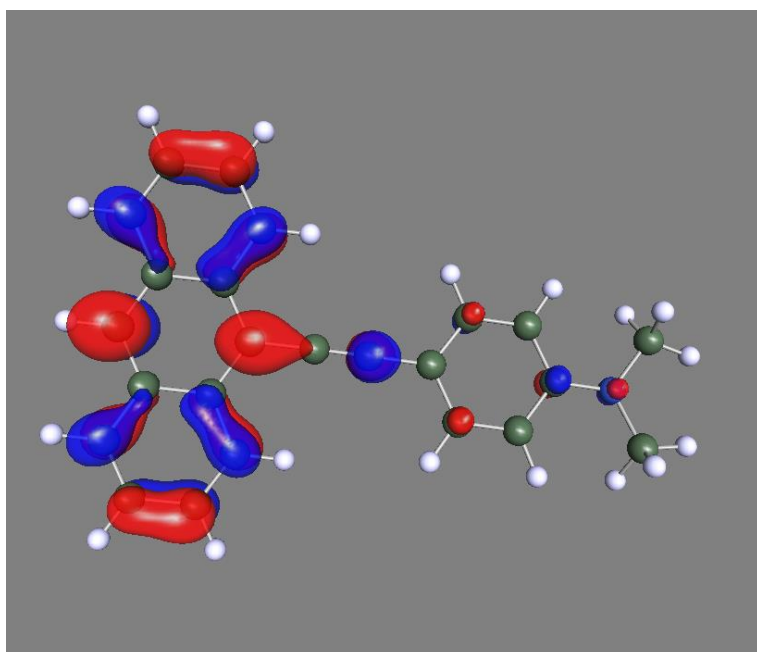

Fig. 39 ESI LUMO orbital of 2NacDMA

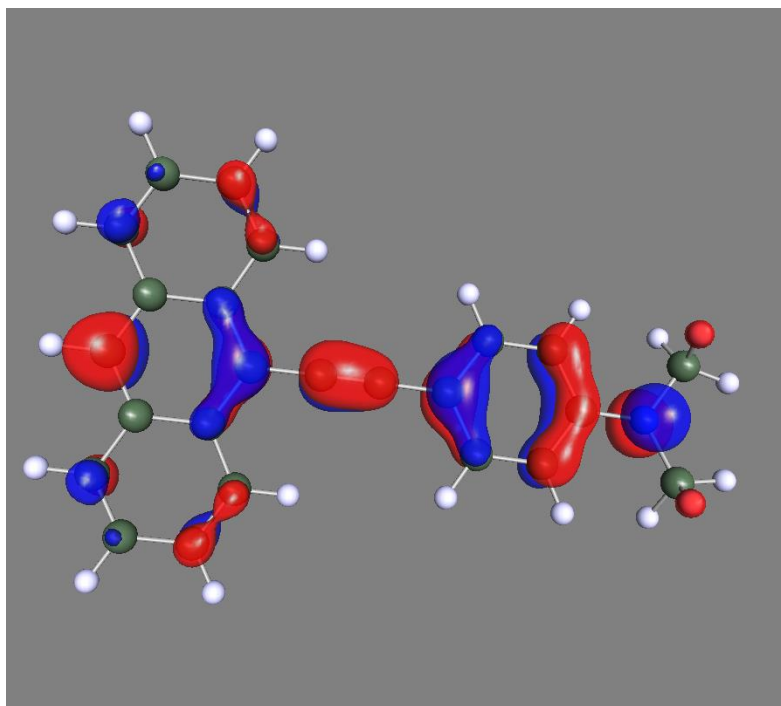

Fig. 40 ESI HOMO orbital of AacDMA

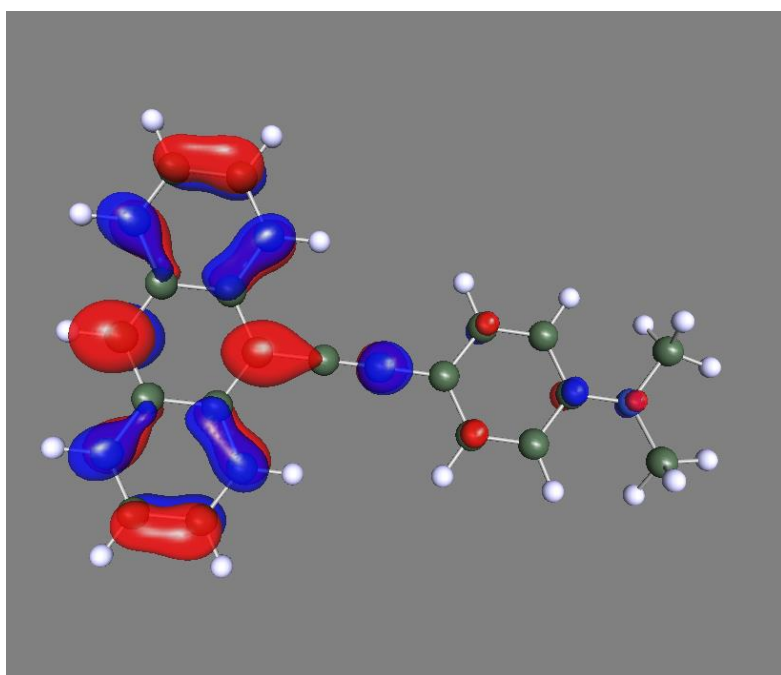

Fig. 41 ESI LUMO orbital of AacDMA

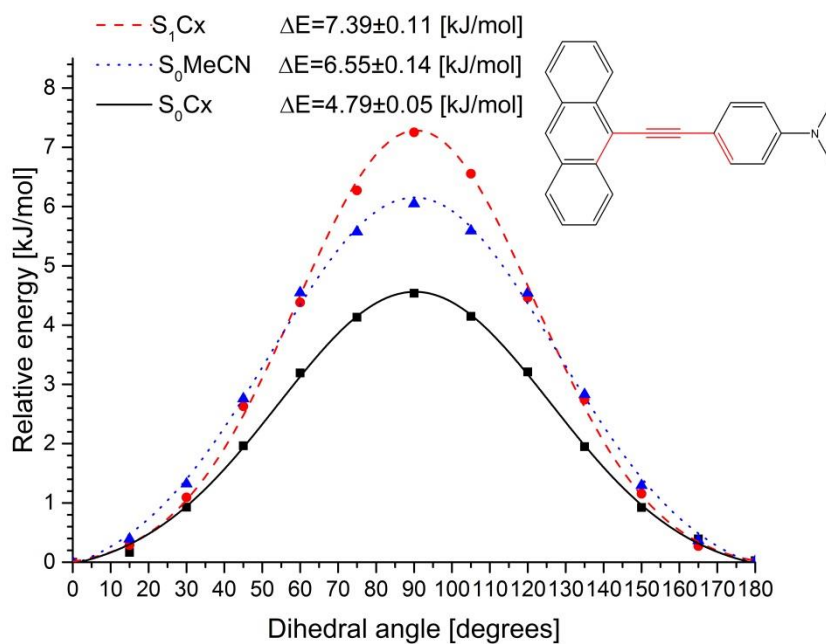

Fig. 42 ESI The dependence of energy on dihedral angle for AacDMA. Lines denote the best fit of Gaussian function to the calculated points. Solid black line for  $\epsilon=2$  (cyclohexane in the ground state), blue dotted line for  $\epsilon=37.5$  (acetonitrile in the ground state), dashed red line  $\epsilon=2$  (cyclohexane in the excited state).

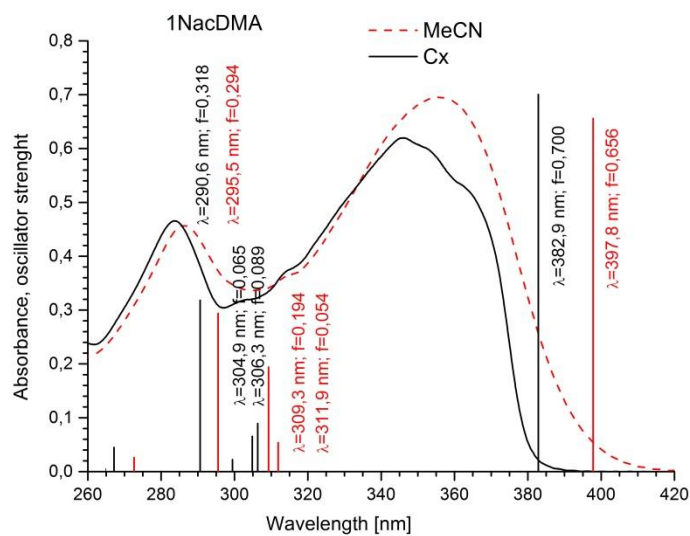

Fig. 43 ESI Absorption spectra of 1NacDMA in cyclohexane (black line) and acetonitrile (red line) and calculated vertical transitions in absorption for  $\epsilon=2$  (cyclohexane, black vertical lines) and  $\epsilon=37.5$  (acetonitrile, red vertical lines).



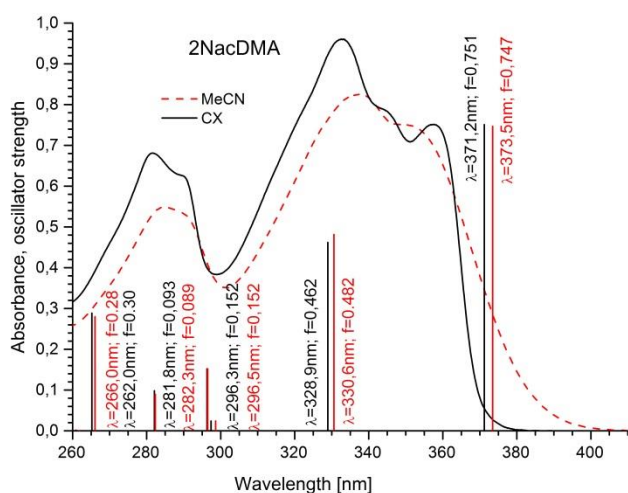

Fig. 44 ESI Absorption spectra of 2NacDMA in cyclohexane (black line) and acetonitrile (red line) and calculated vertical transitions in absorption for  $\epsilon=2$  (cyclohexane, black vertical lines) and  $\epsilon=37.5$  (acetonitrile, red vertical lines).

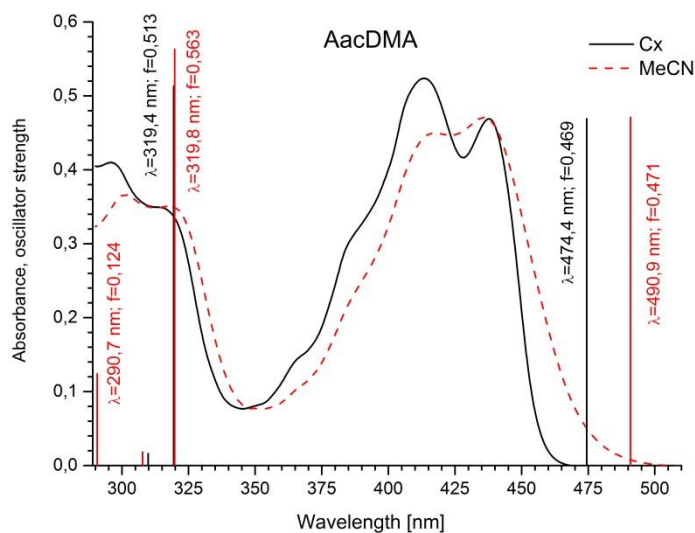

Fig. 45 ESI Absorption spectra of AacDMA in cyclohexane (black line) and acetonitrile (red line) and calculated vertical transitions in absorption for  $\epsilon=2$  (cyclohexane, black vertical lines) and  $\epsilon=37.5$  (acetonitrile, red vertical lines).

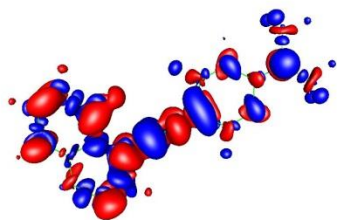

Fig. 46 ESI The difference of electron density between the excited and ground state for 1NacDMA. The blue color denotes decrease and red increase of electron density.

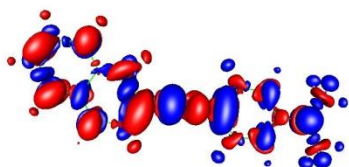

Fig. 47 ESI The difference of electron density between the excited and ground state for 2NacDMA. The blue color denotes decrease and red increase of electron density.

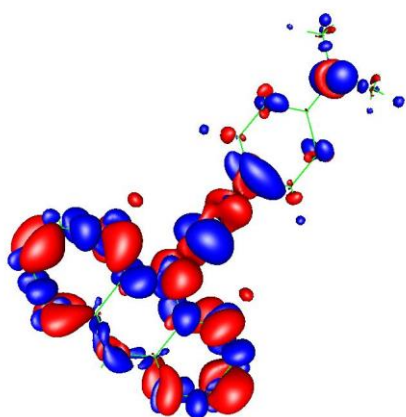

Fig. 48 ESI The difference of electron density between the excited and ground state for AacDMA. The blue color denotes decrease and red increase of electron density.

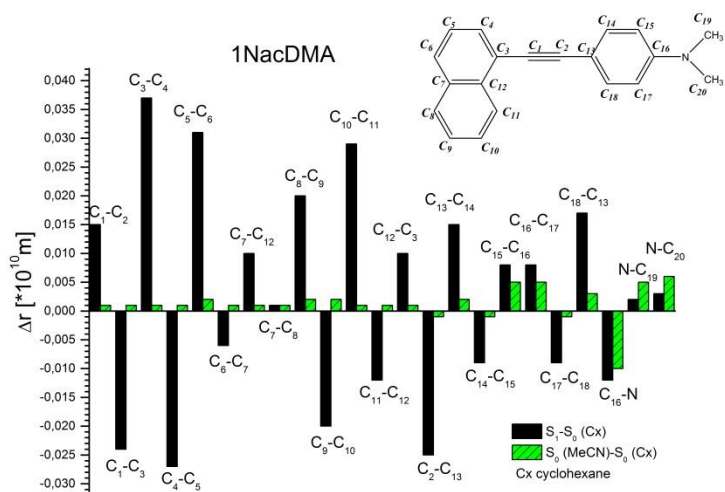

Fig. 49 ESI The changes in the bond lengths between the optimized structures calculated in excited and ground state for  $\epsilon=2$  (black bars) as well as between optimized structures calculated in the ground state for  $\epsilon=37.5$  and  $\epsilon=2$  for 1NacDMA.

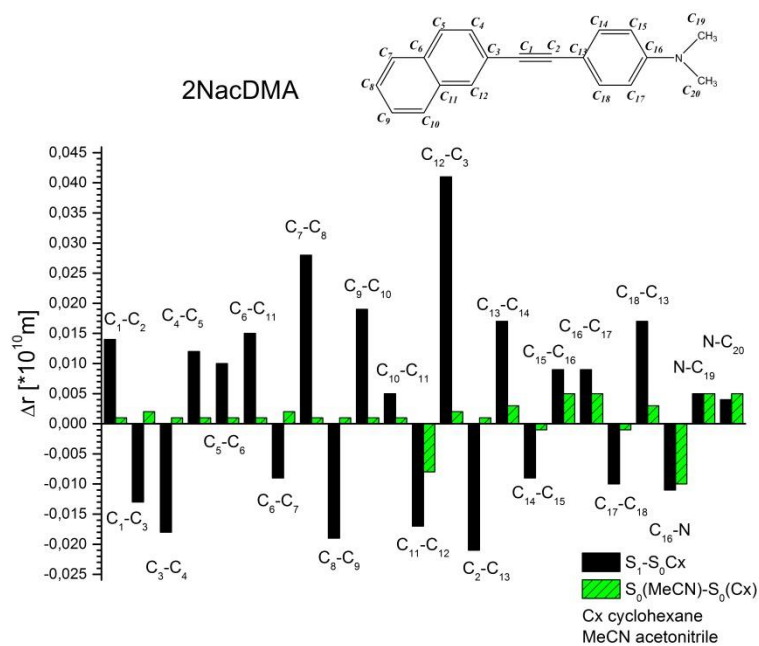

Fig. 50 ESI The changes in the bond lengths between the optimized structures calculated in excited and ground state for  $\epsilon=2$  (black bars) as well as between optimized structures calculated in the ground state for  $\epsilon=37.5$  and  $\epsilon=2$  for 2NacDMA.

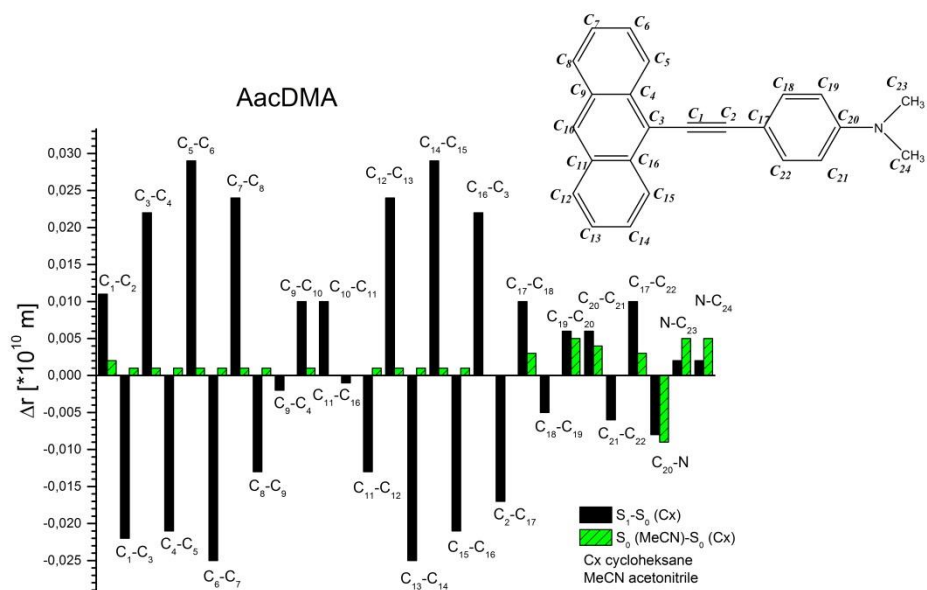

Fig. 51 ESI The changes in the bond lengths between the optimized structures calculated in excited and ground state for  $\epsilon=2$  (black bars) as well as between optimized structures calculated in the ground state for  $\epsilon=37.5$  and  $\epsilon=2$  for AacDMA.
